# Supplementary figures and images for: Efficacy and Safety of Wuling Powder in the Treatment of Patients with Diabetic Nephropathy: A Systematic Review and Meta-Analysis
Source: Hindawi journal article supplement (doi:10.1155/2022/1720749), 2022-09-30

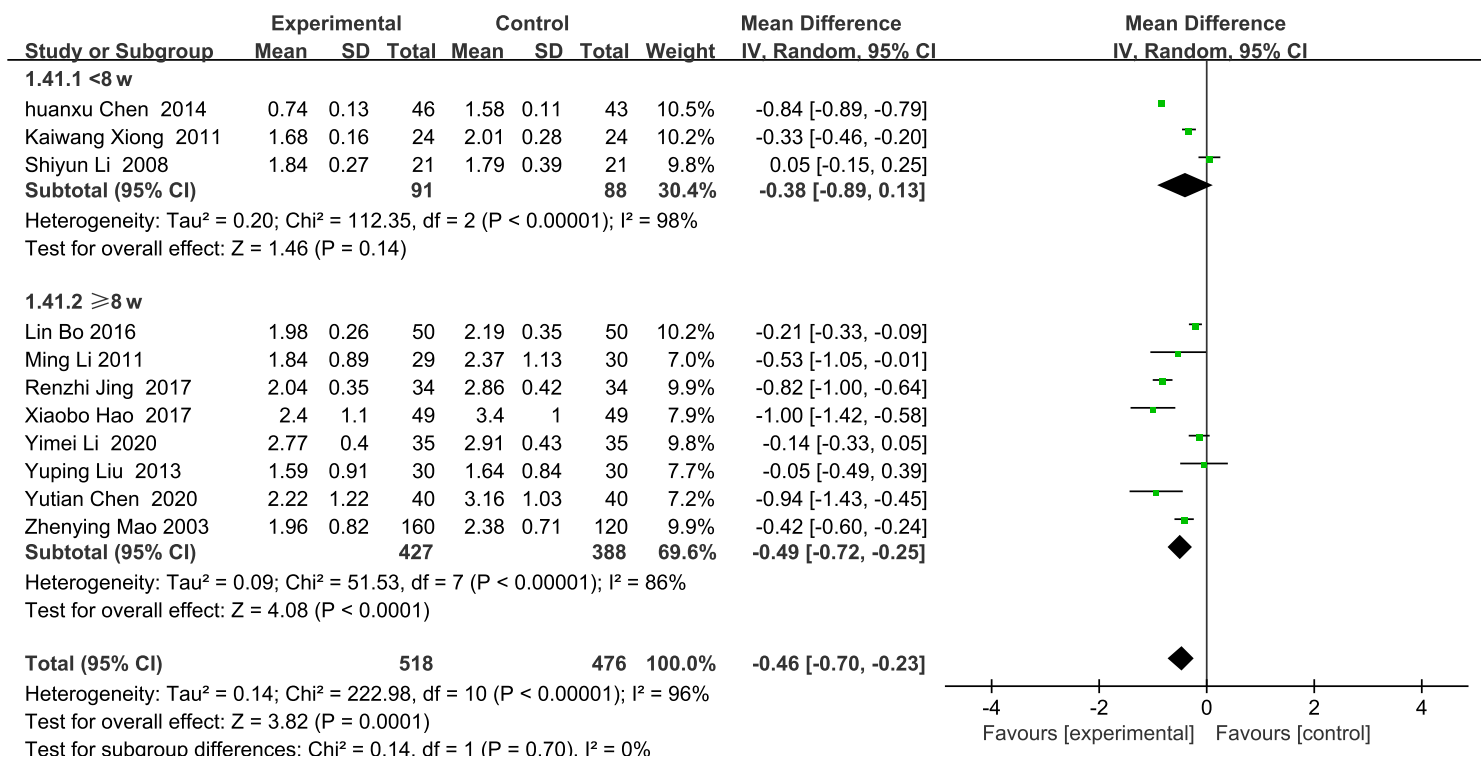

Supplement: f1 [file 1720749.f1.zip]

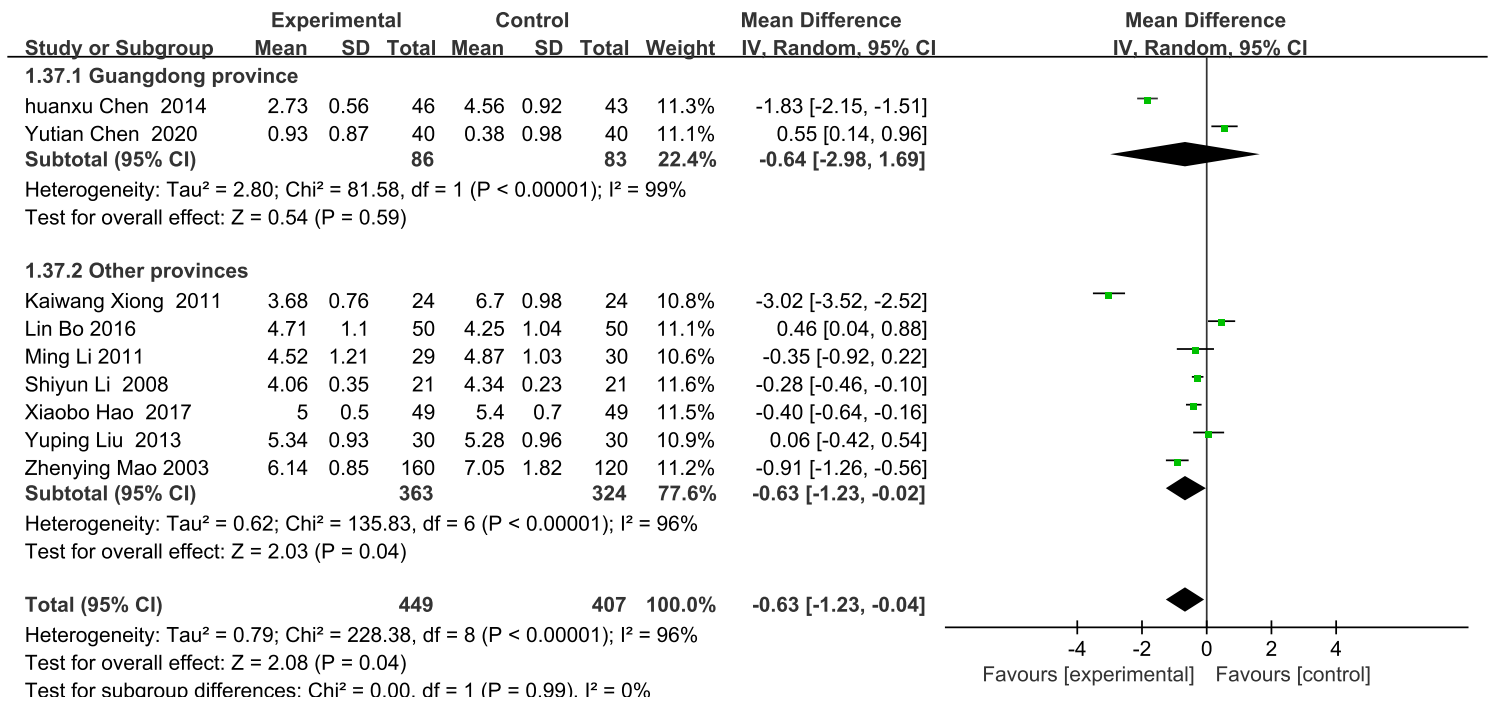

Supplement: f1 [file 1720749.f1.zip]

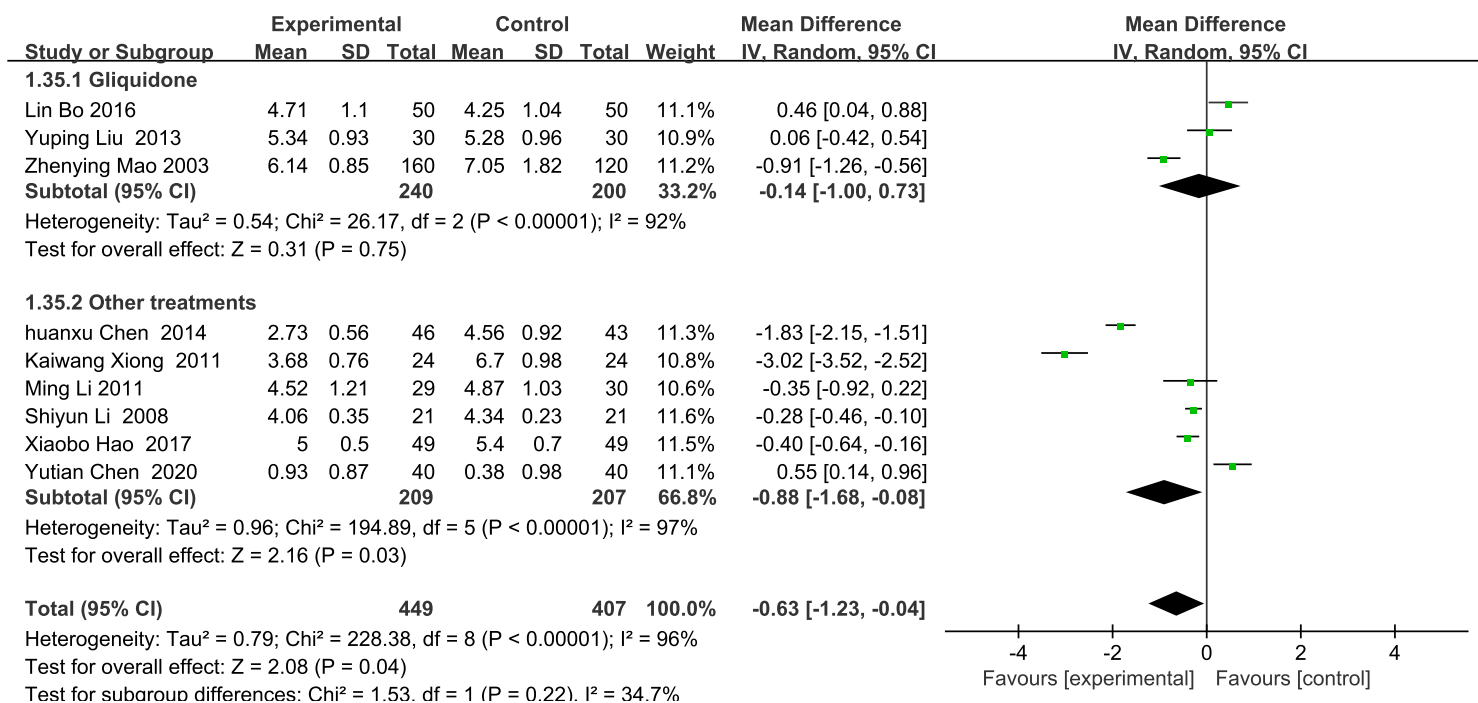

Supplement: f1 [file 1720749.f1.zip]

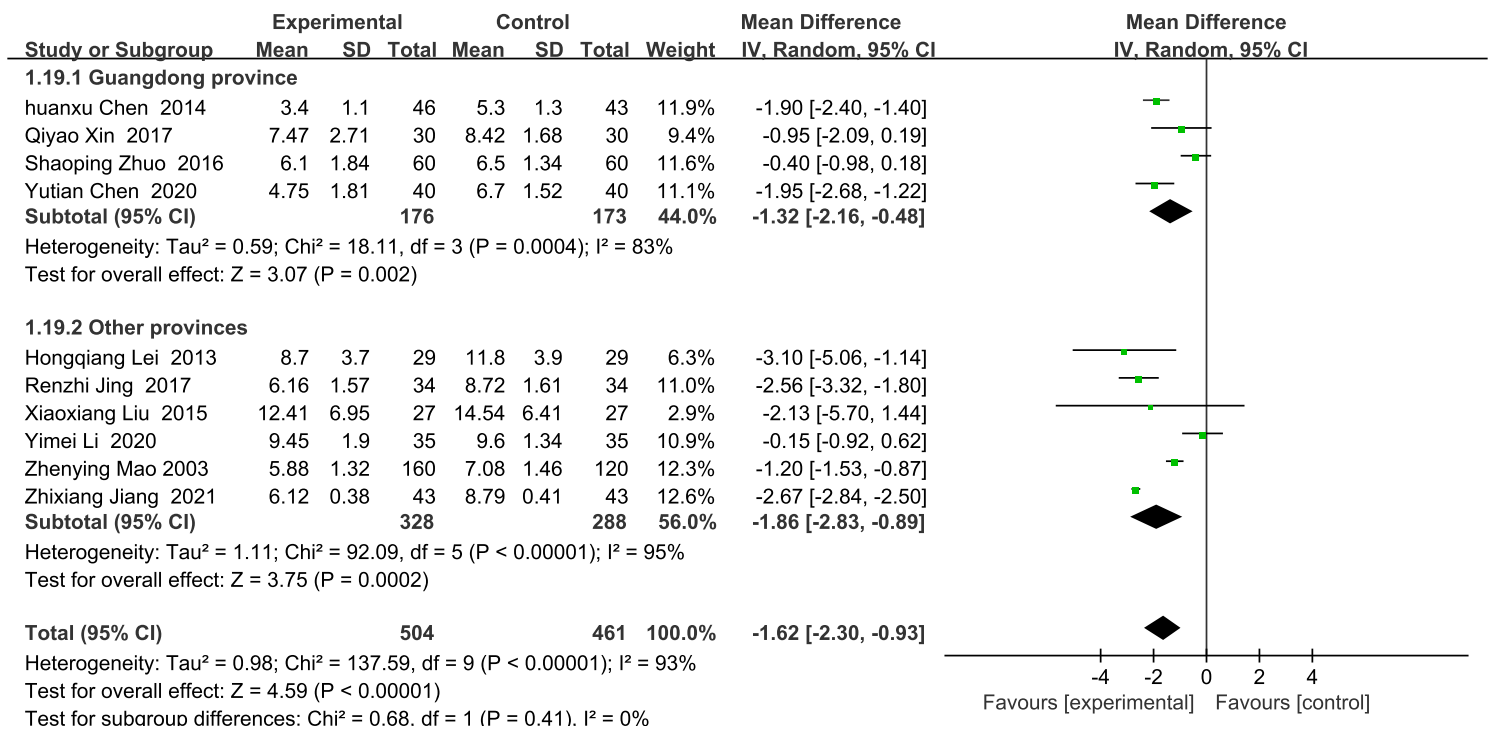

Supplement: f1 [file 1720749.f1.zip]

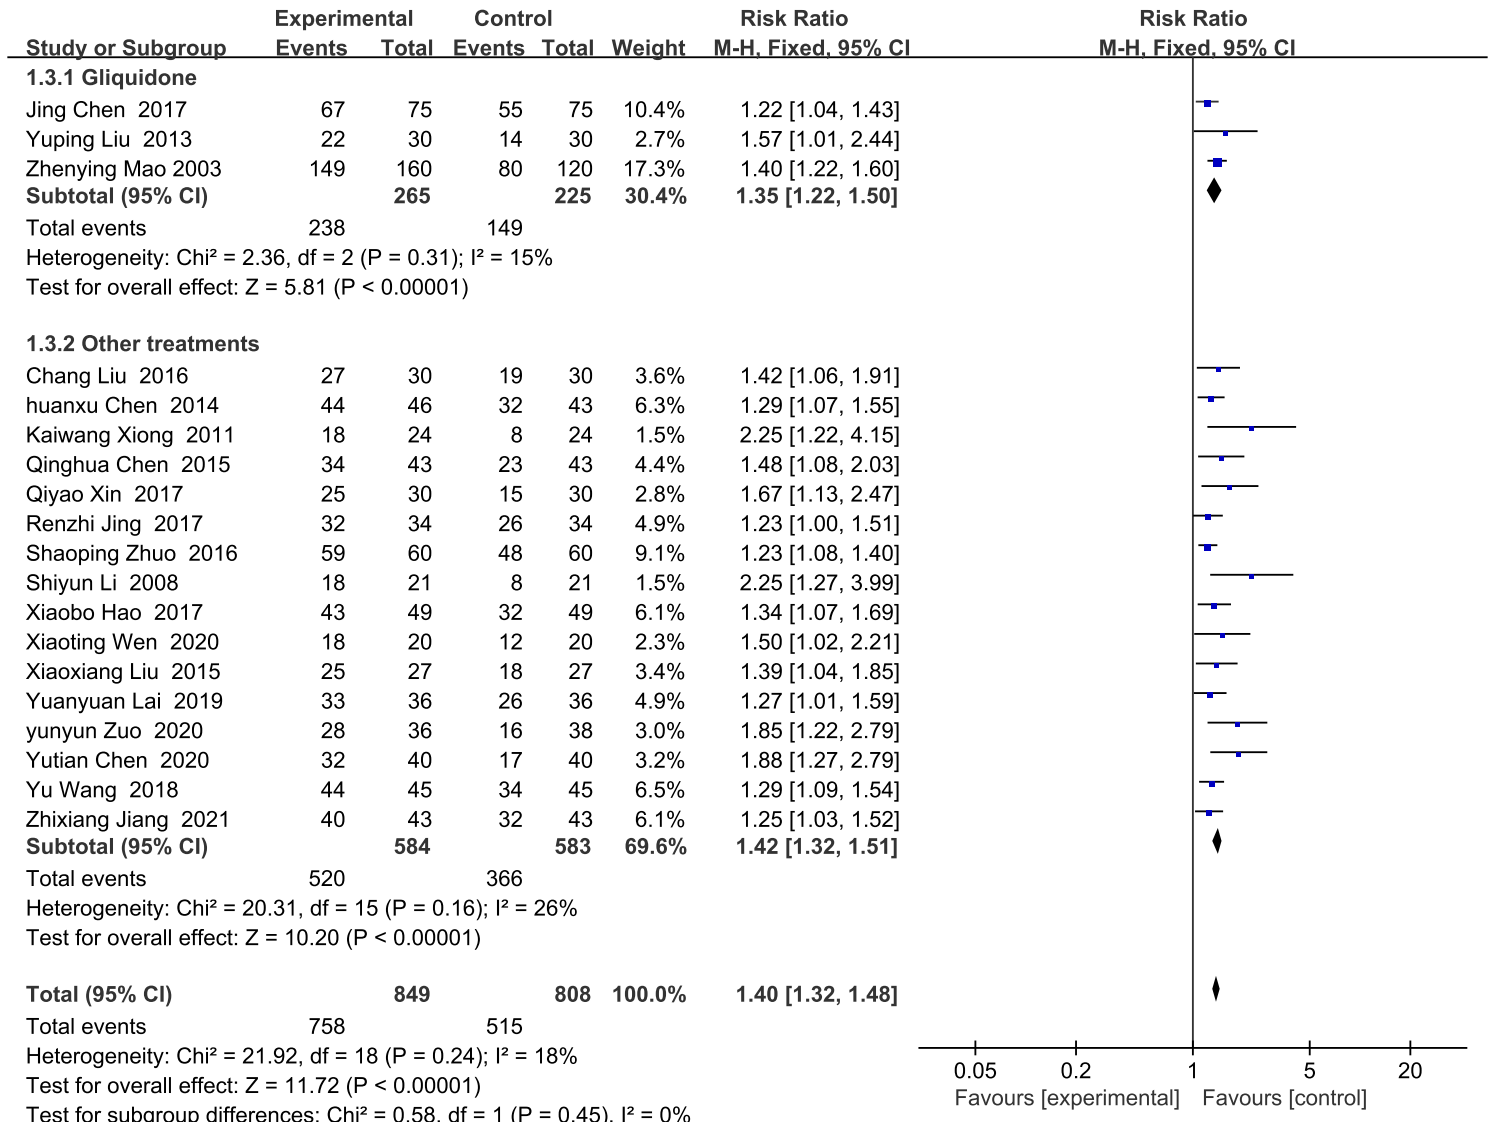

Supplement: f1 [file 1720749.f1.zip]

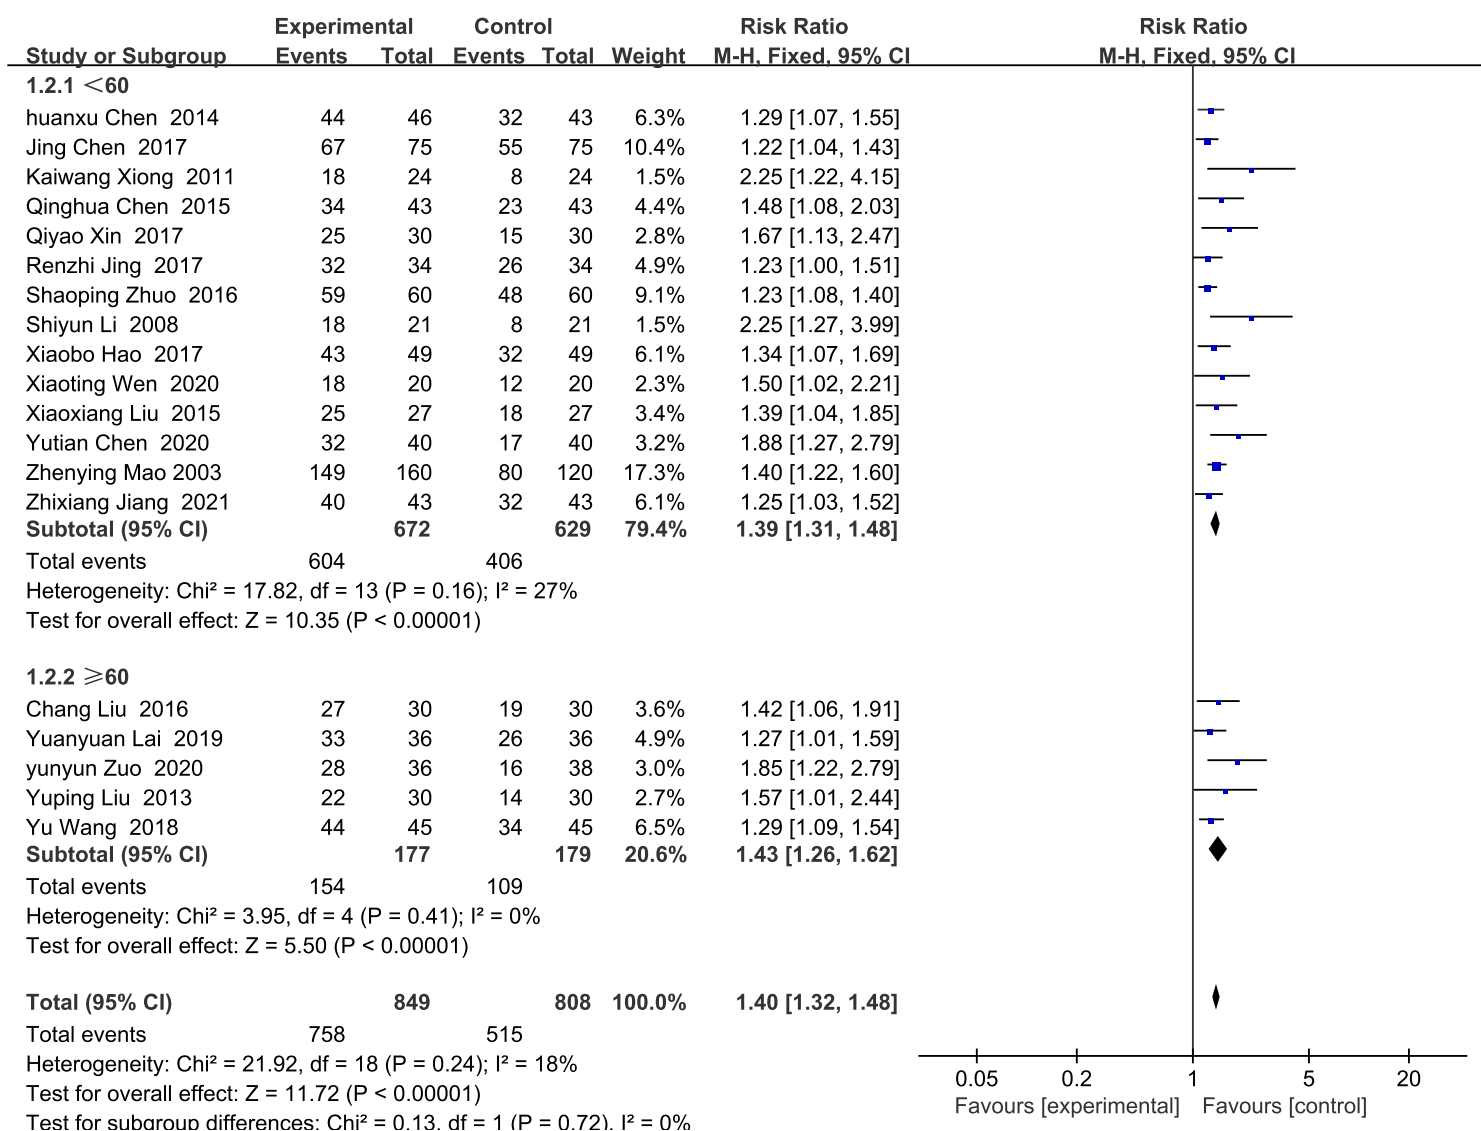

Supplement: f1 [file 1720749.f1.zip]

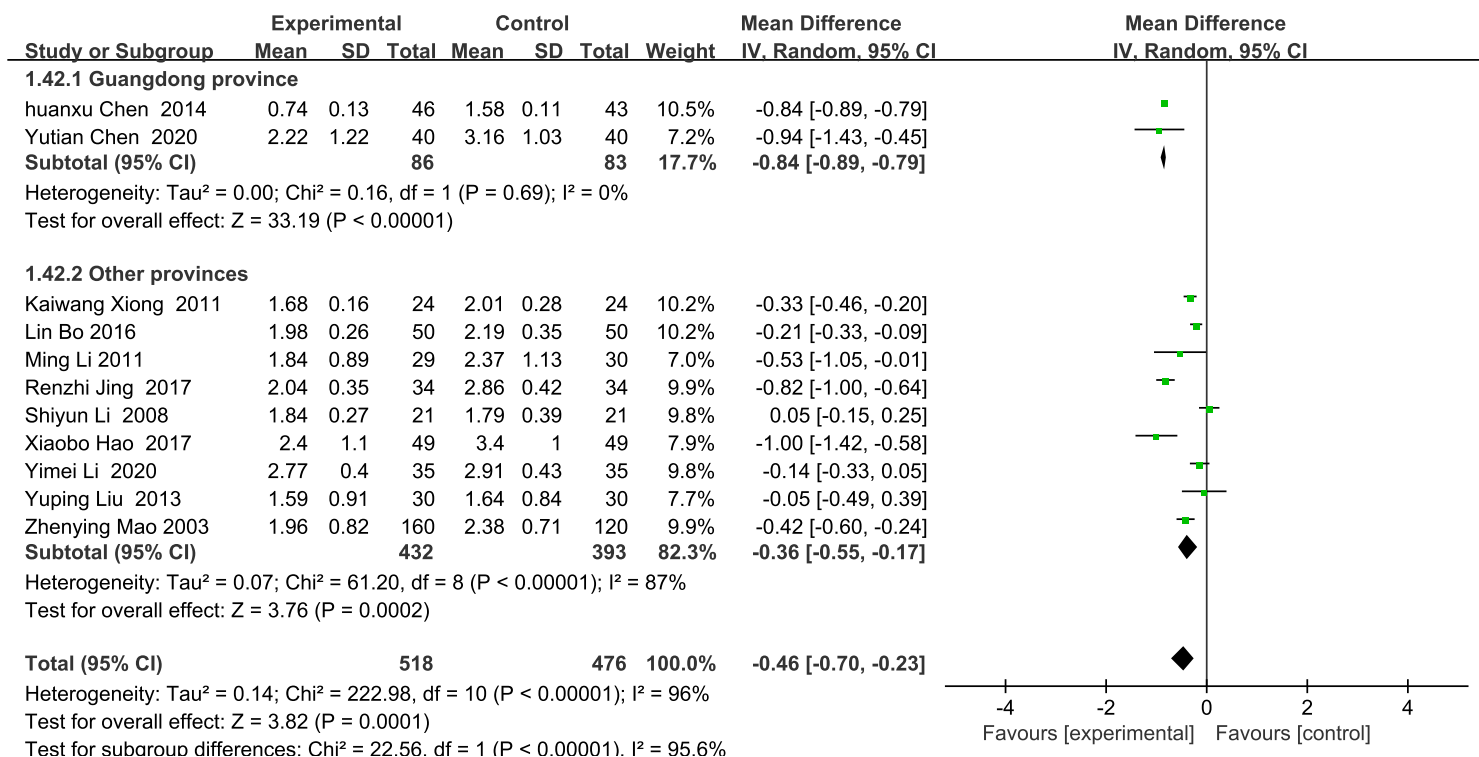

Supplement: f1 [file 1720749.f1.zip]

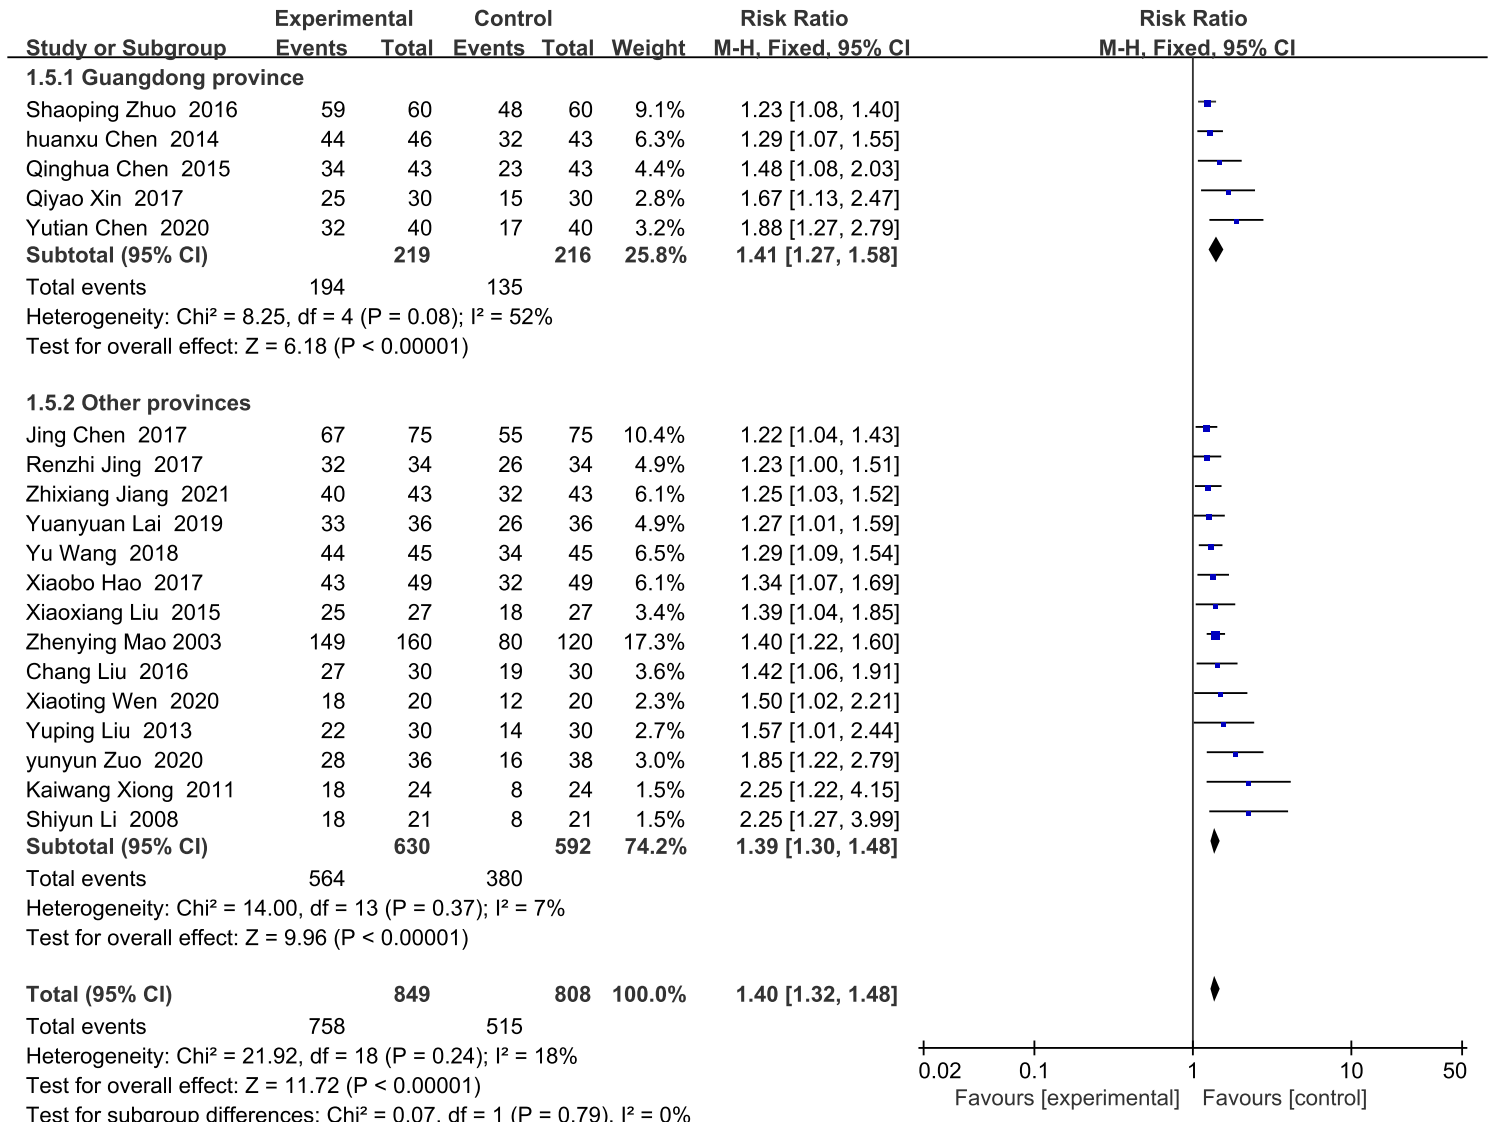

Supplement: f1 [file 1720749.f1.zip]

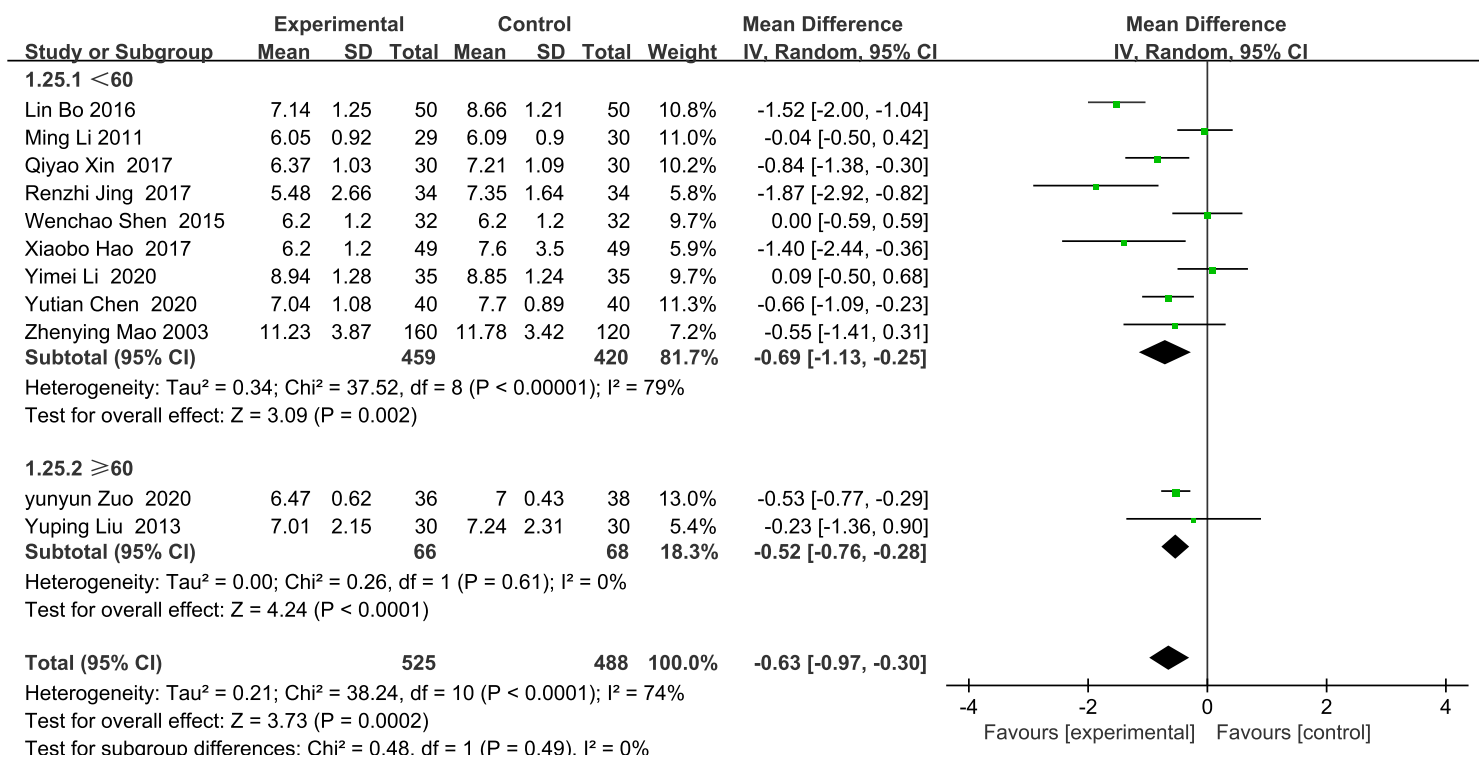

Supplement: f1 [file 1720749.f1.zip]

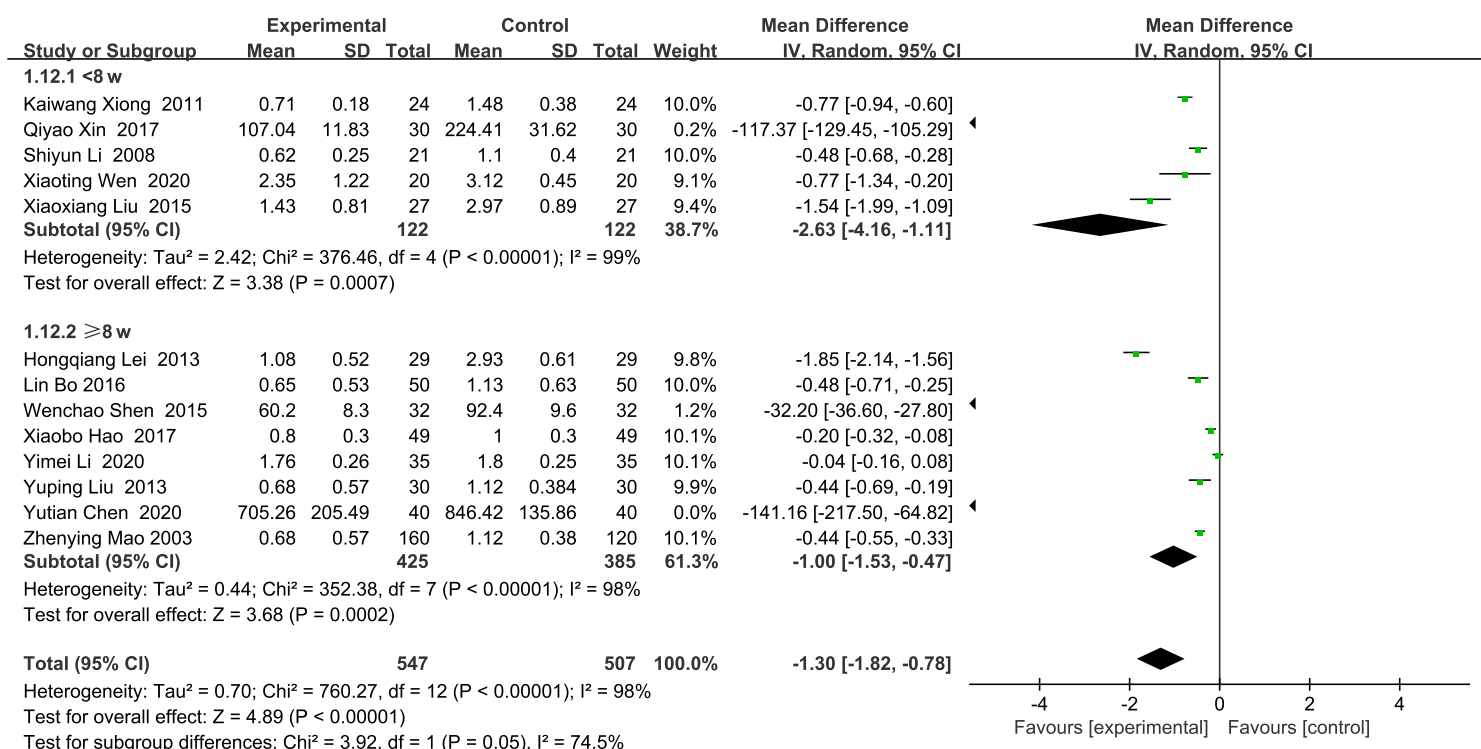

Supplement: f1 [file 1720749.f1.zip]

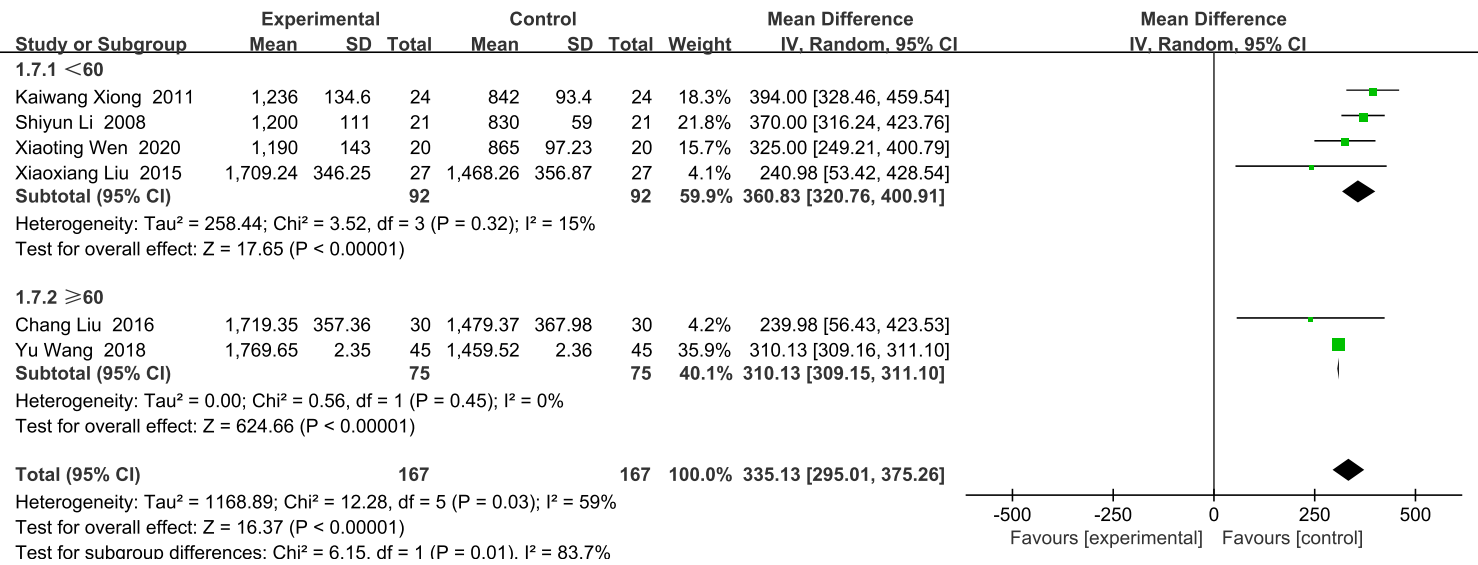

Supplement: f1 [file 1720749.f1.zip]

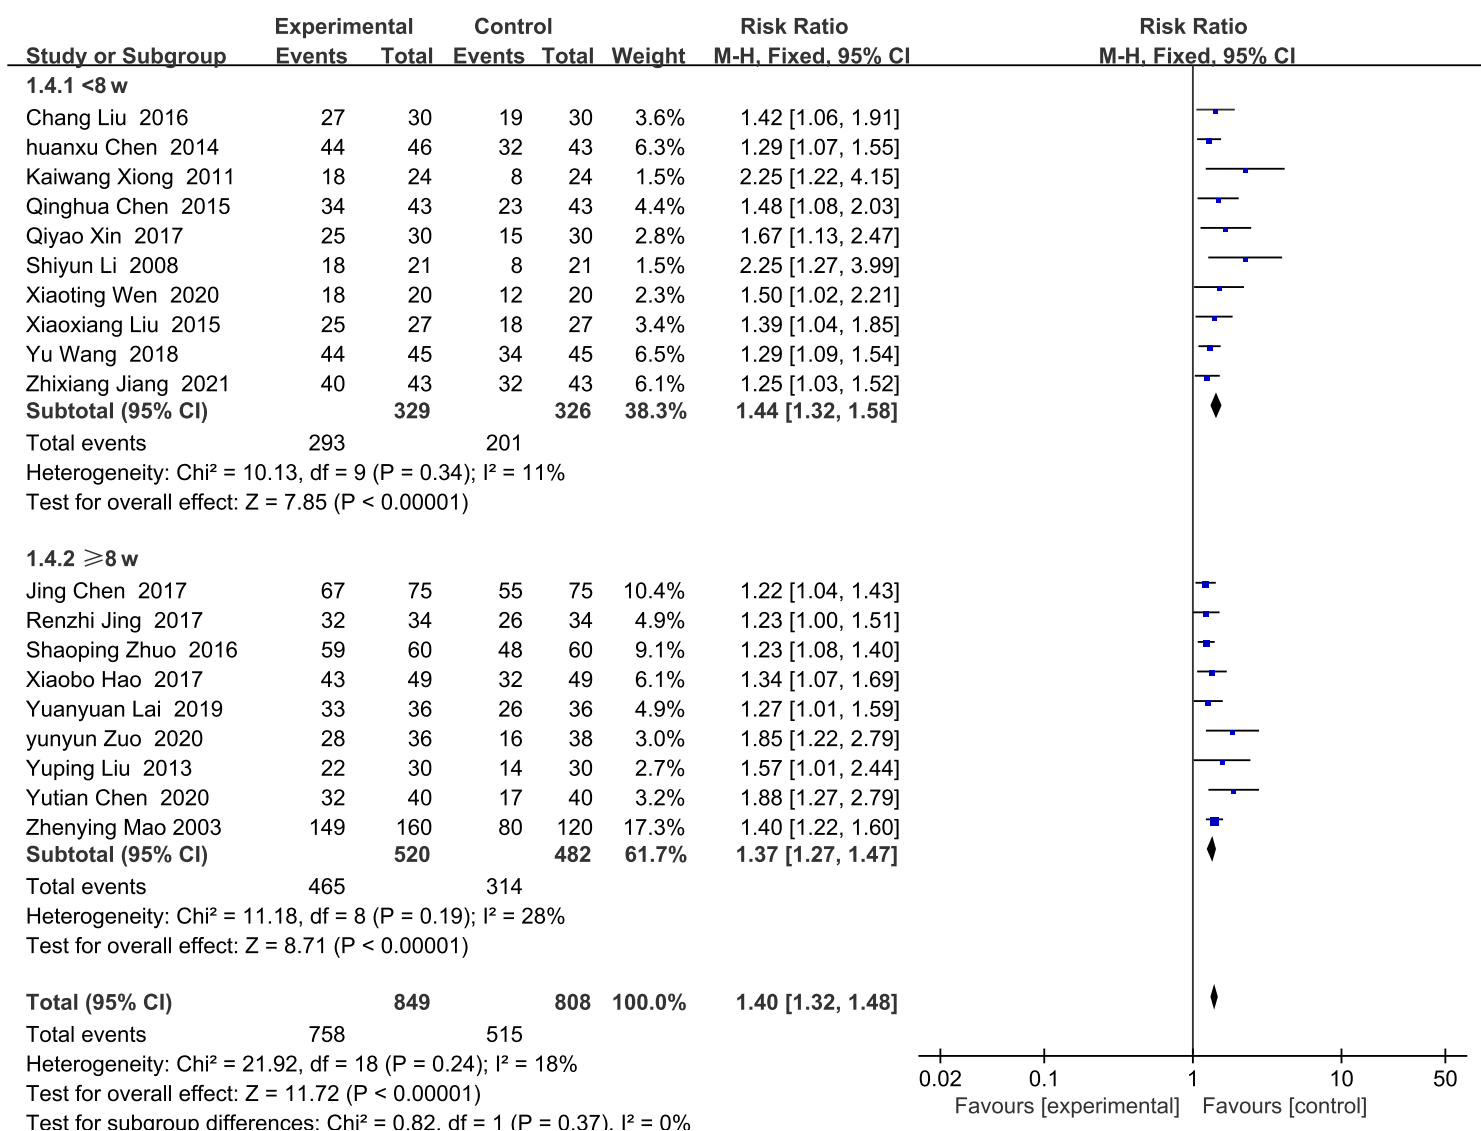

Supplement: f1 [file 1720749.f1.zip]

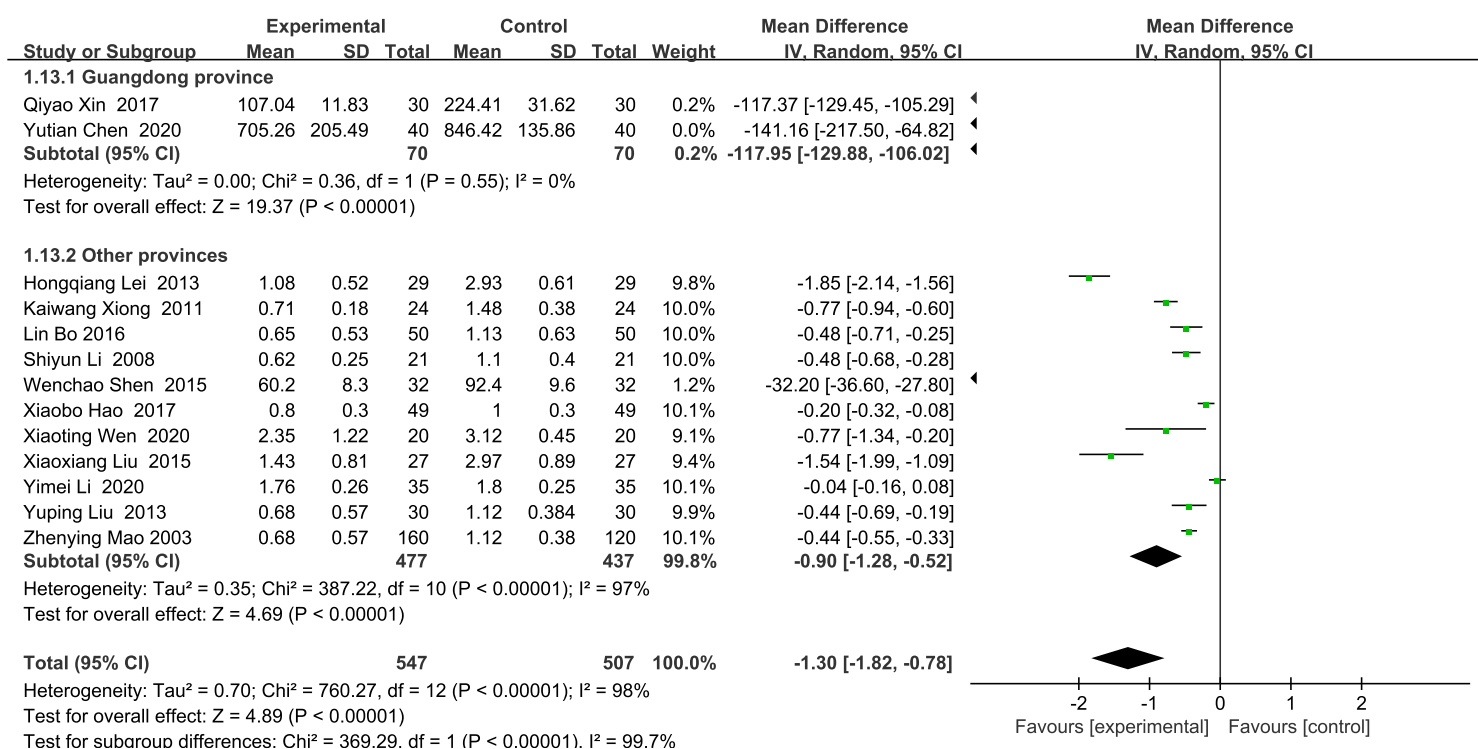

Supplement: f1 [file 1720749.f1.zip]

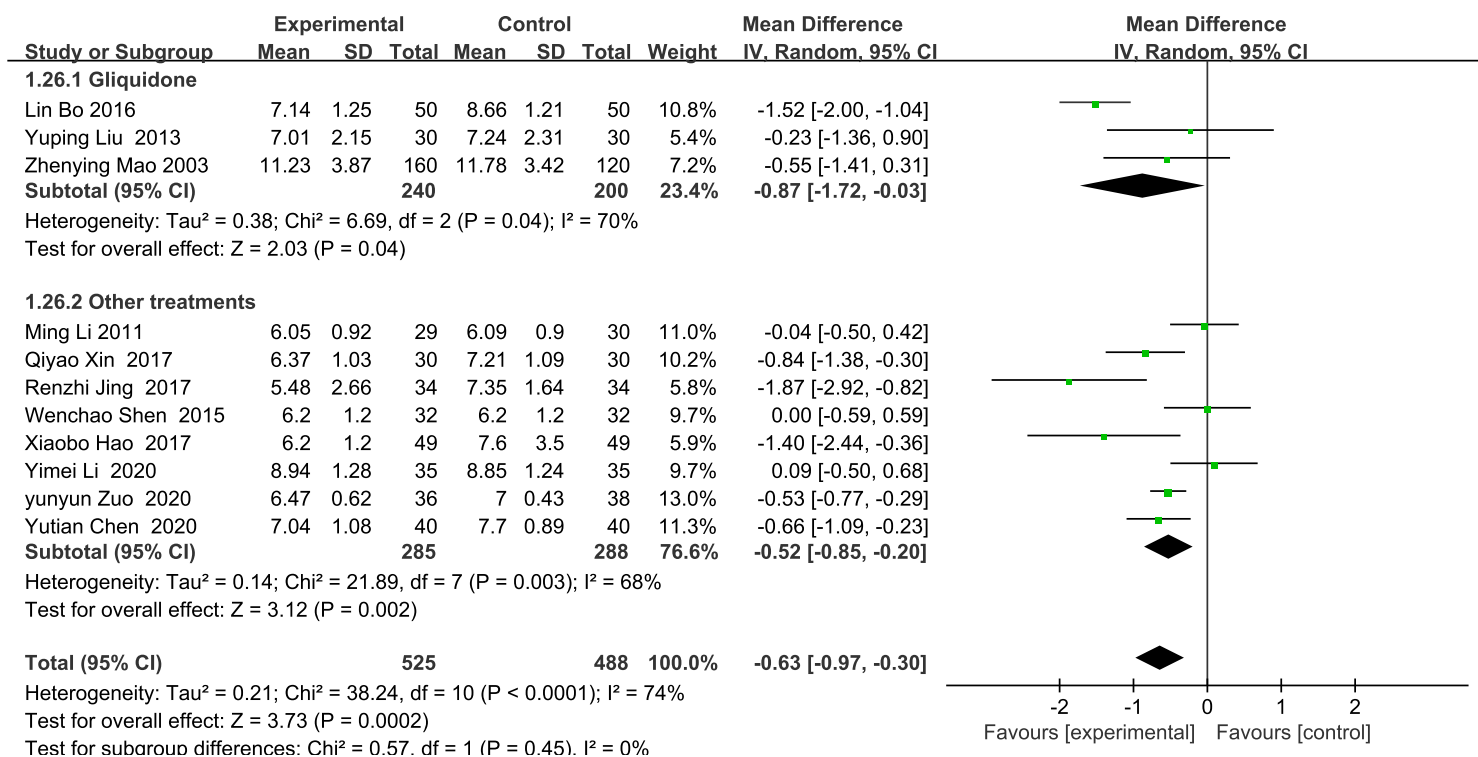

Supplement: f1 [file 1720749.f1.zip]

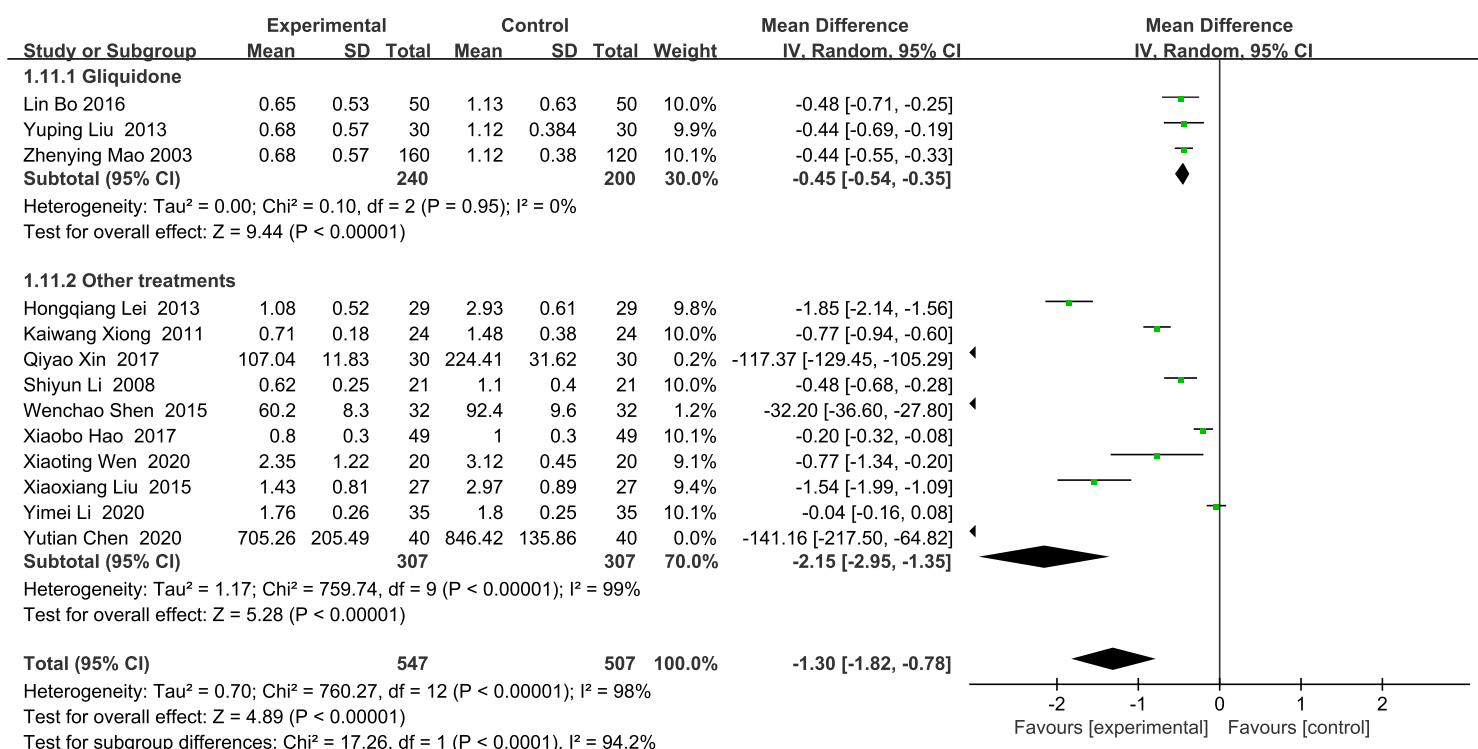

Supplement: f1 [file 1720749.f1.zip]

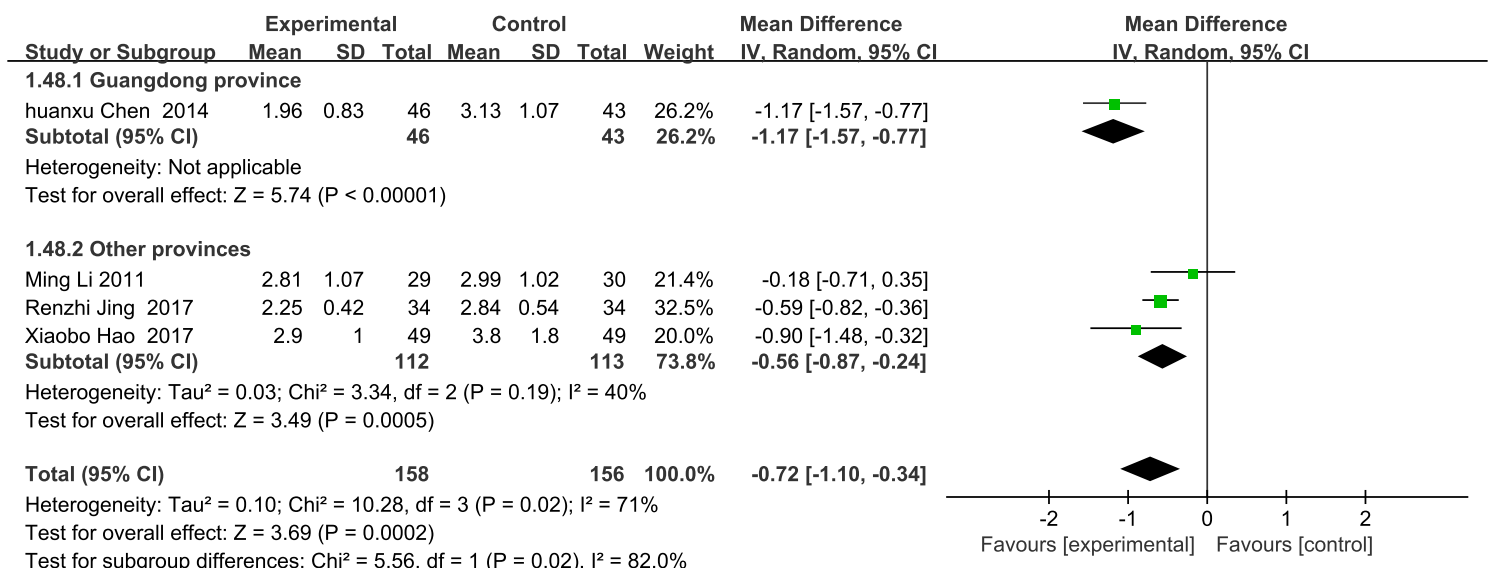

Supplement: f1 [file 1720749.f1.zip]

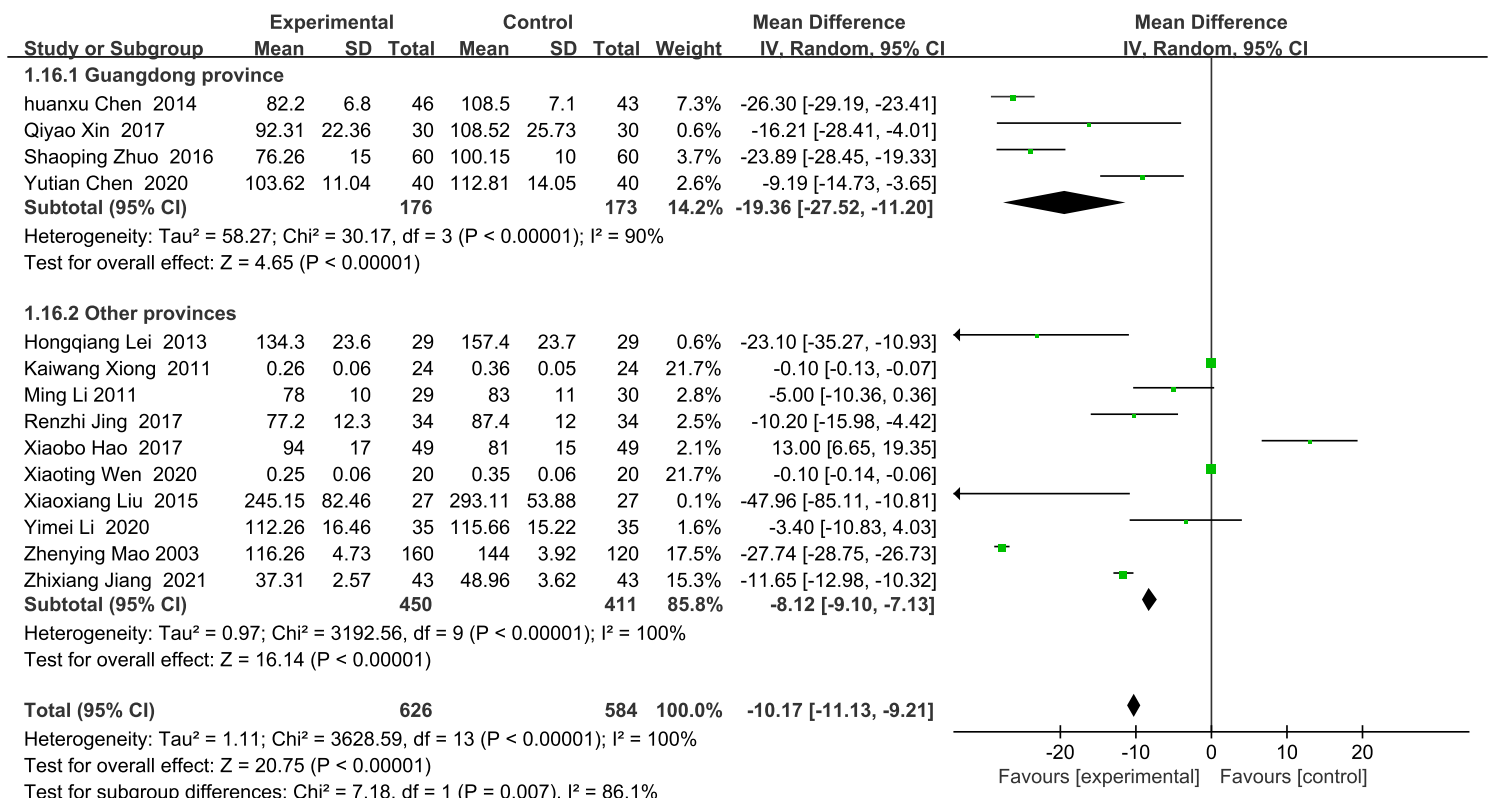

Supplement: f1 [file 1720749.f1.zip]

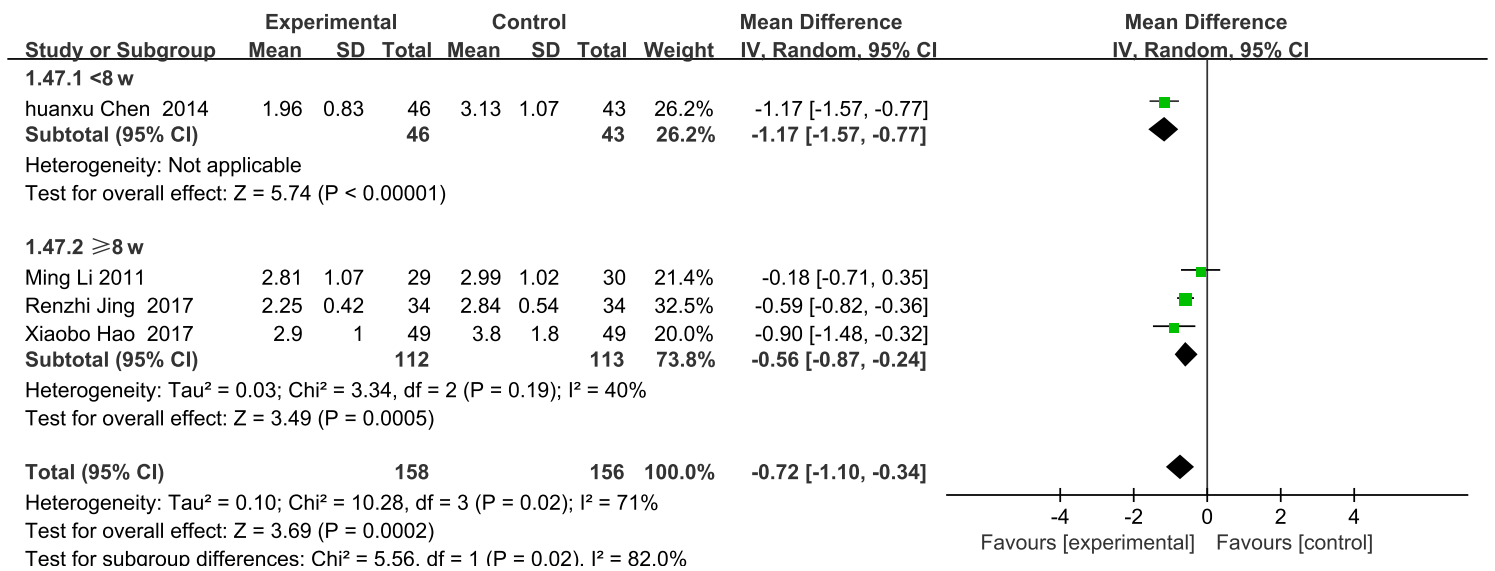

Supplement: f1 [file 1720749.f1.zip]

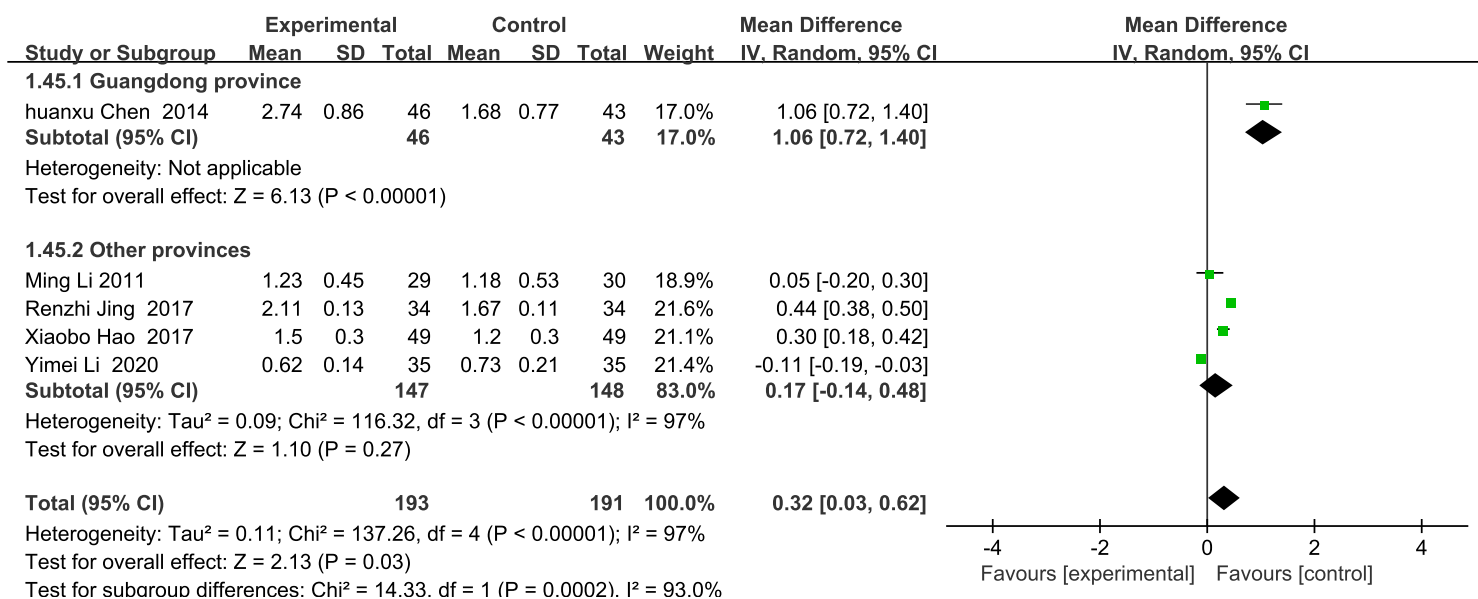

Supplement: f1 [file 1720749.f1.zip]

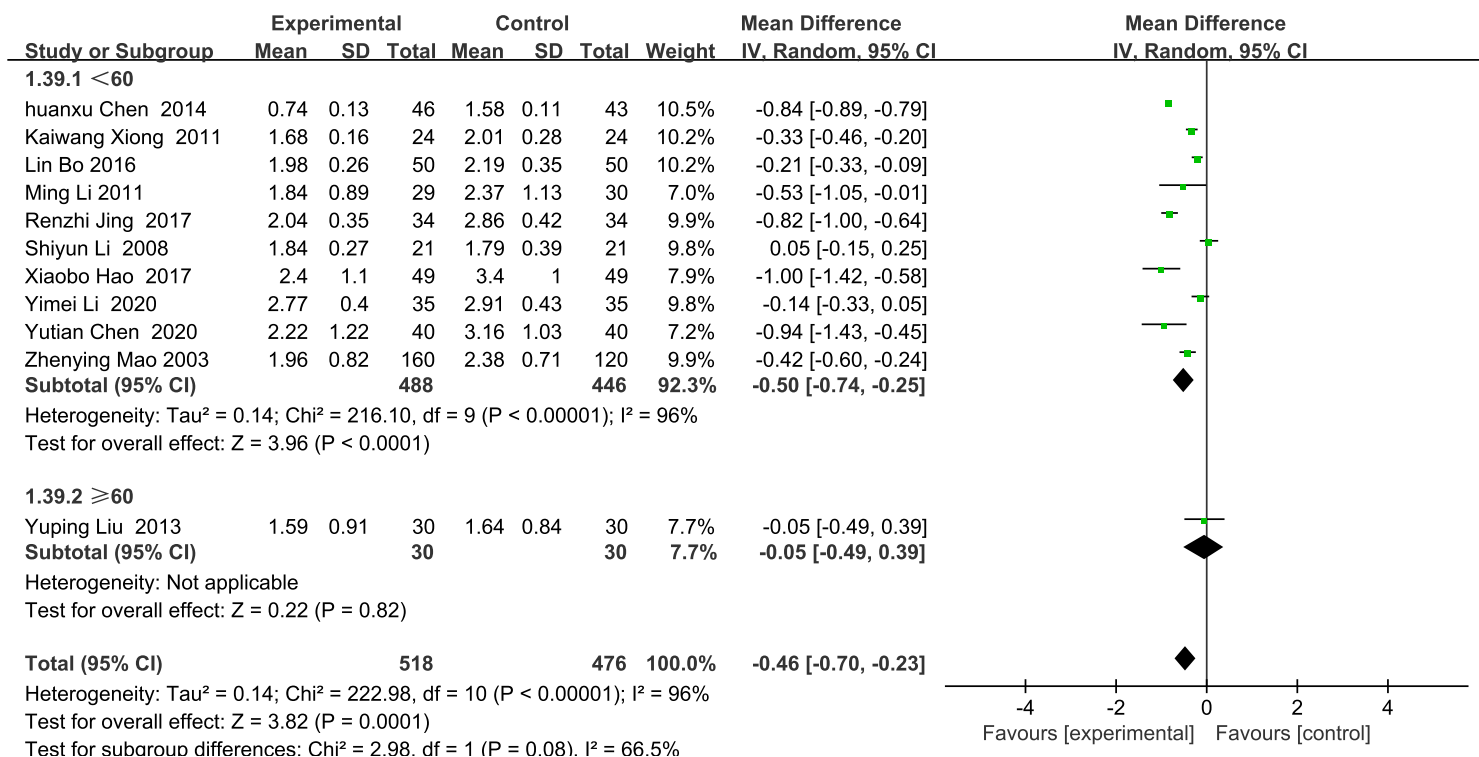

Supplement: f1 [file 1720749.f1.zip]

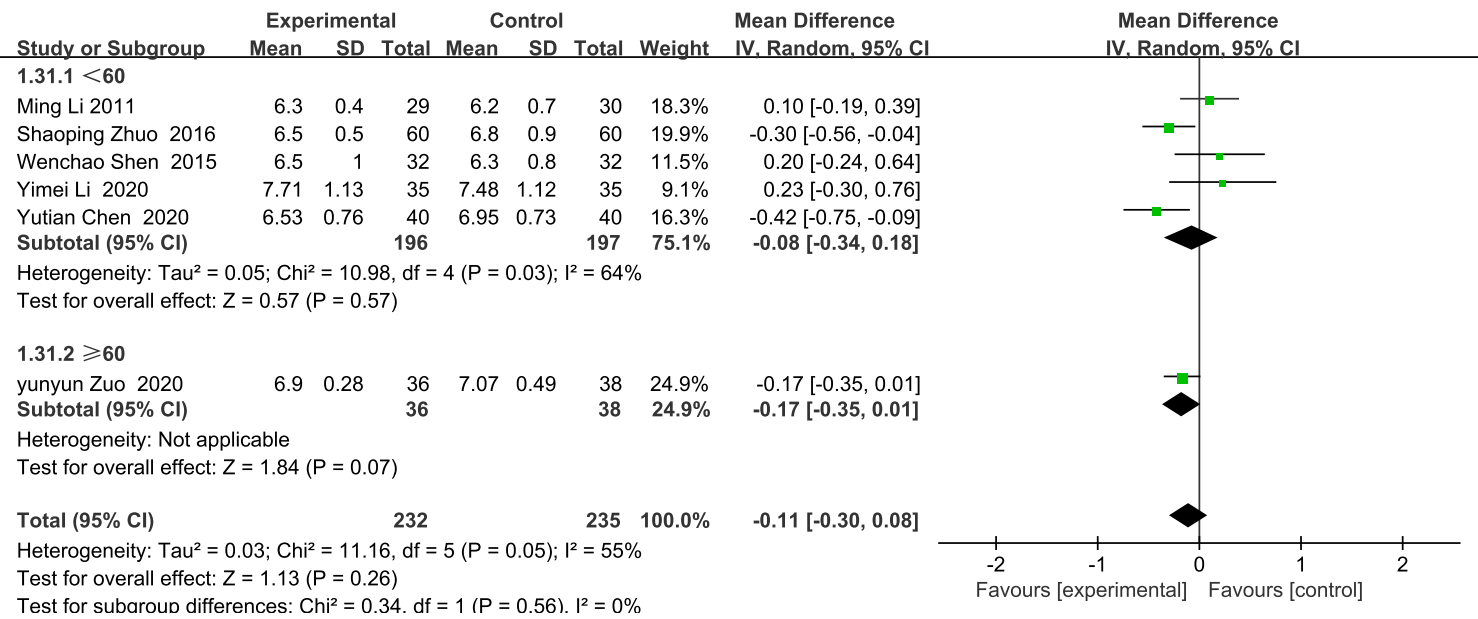

Supplement: f1 [file 1720749.f1.zip]

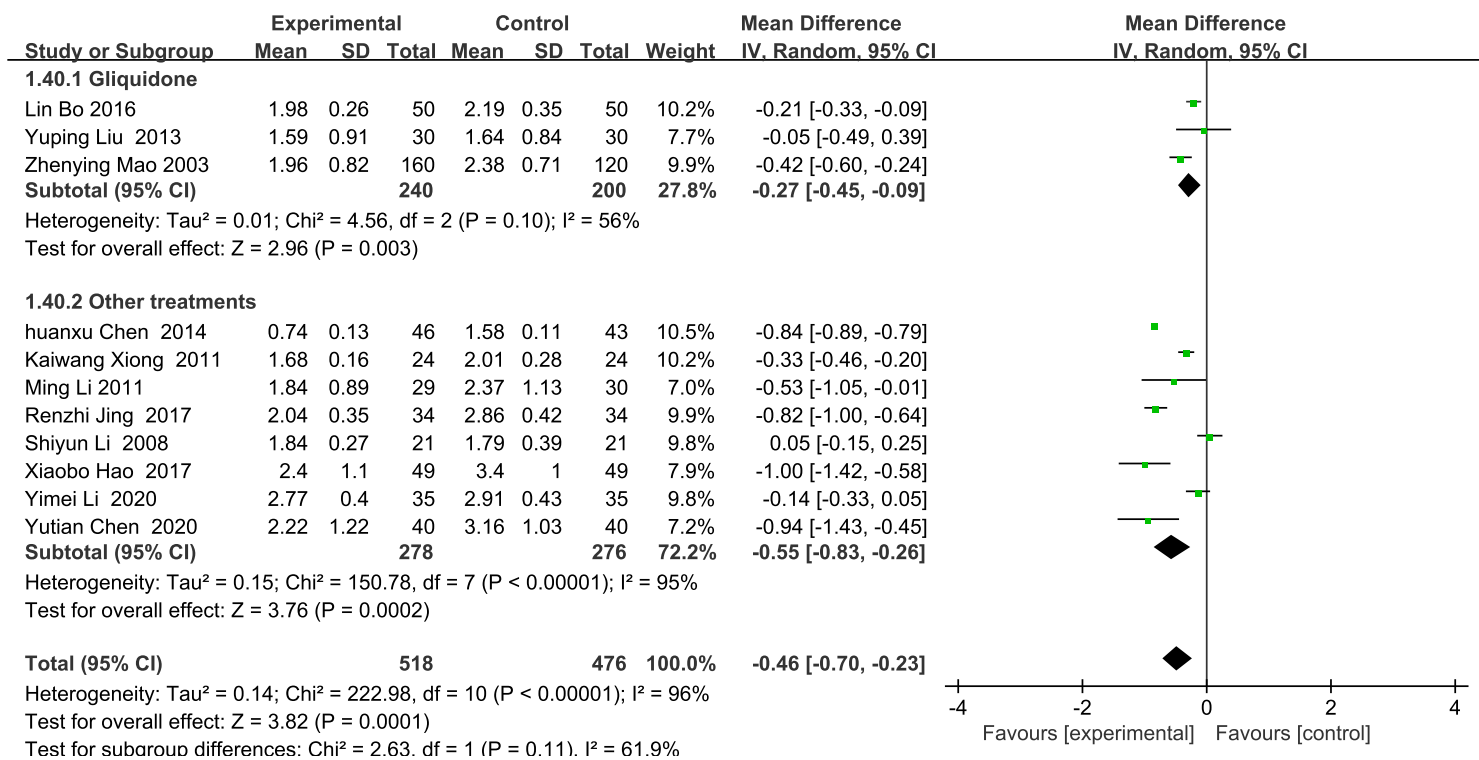

Supplement: f1 [file 1720749.f1.zip]

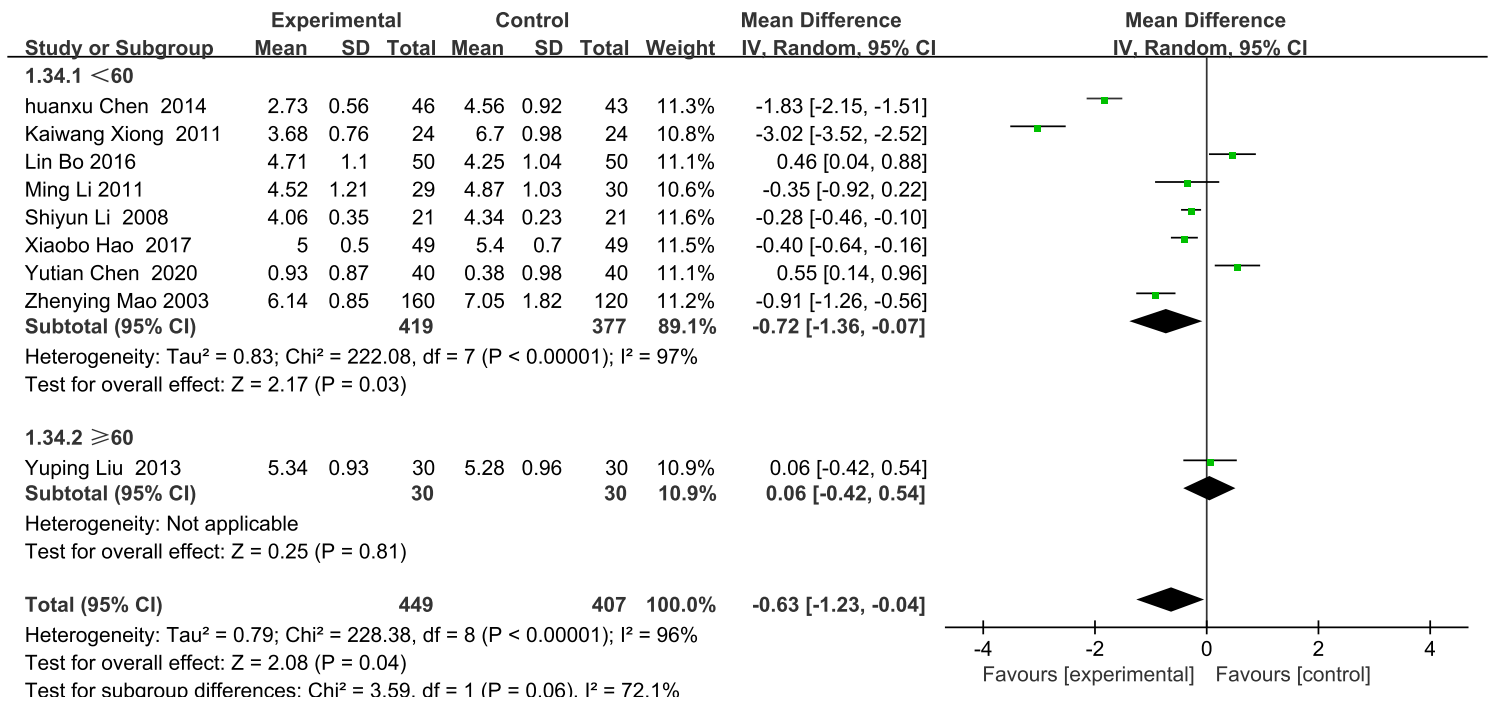

Supplement: f1 [file 1720749.f1.zip]

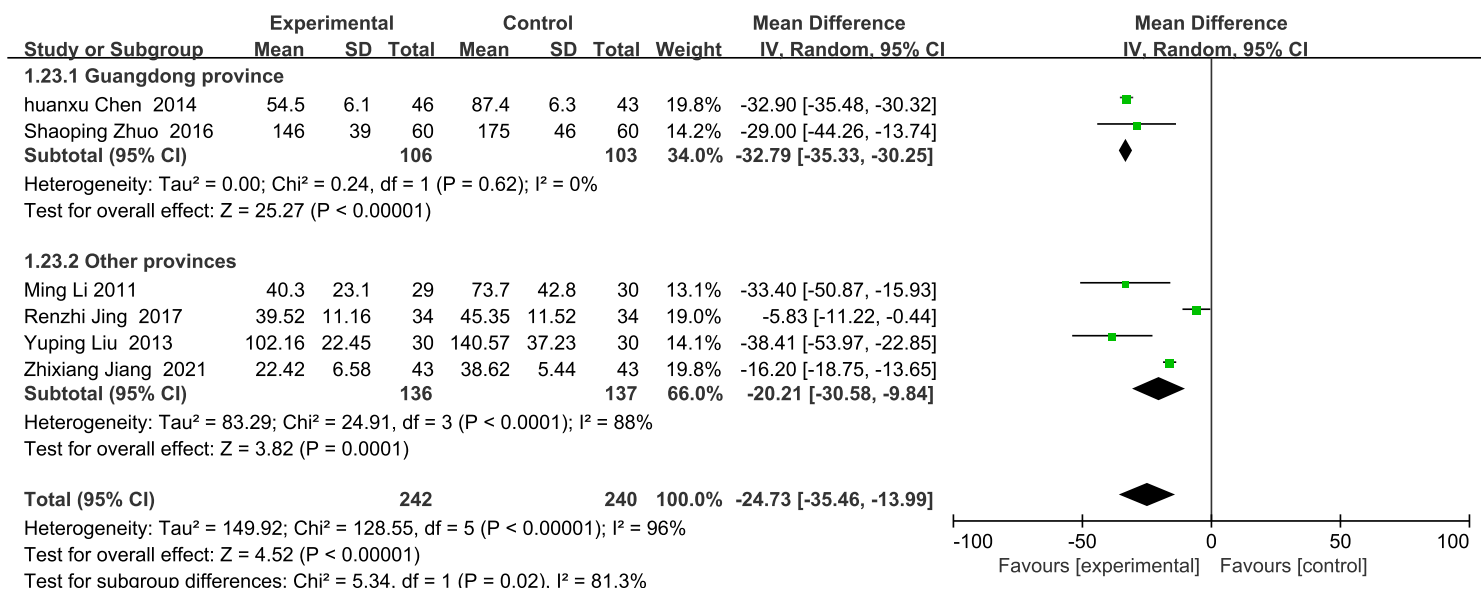

Supplement: f1 [file 1720749.f1.zip]

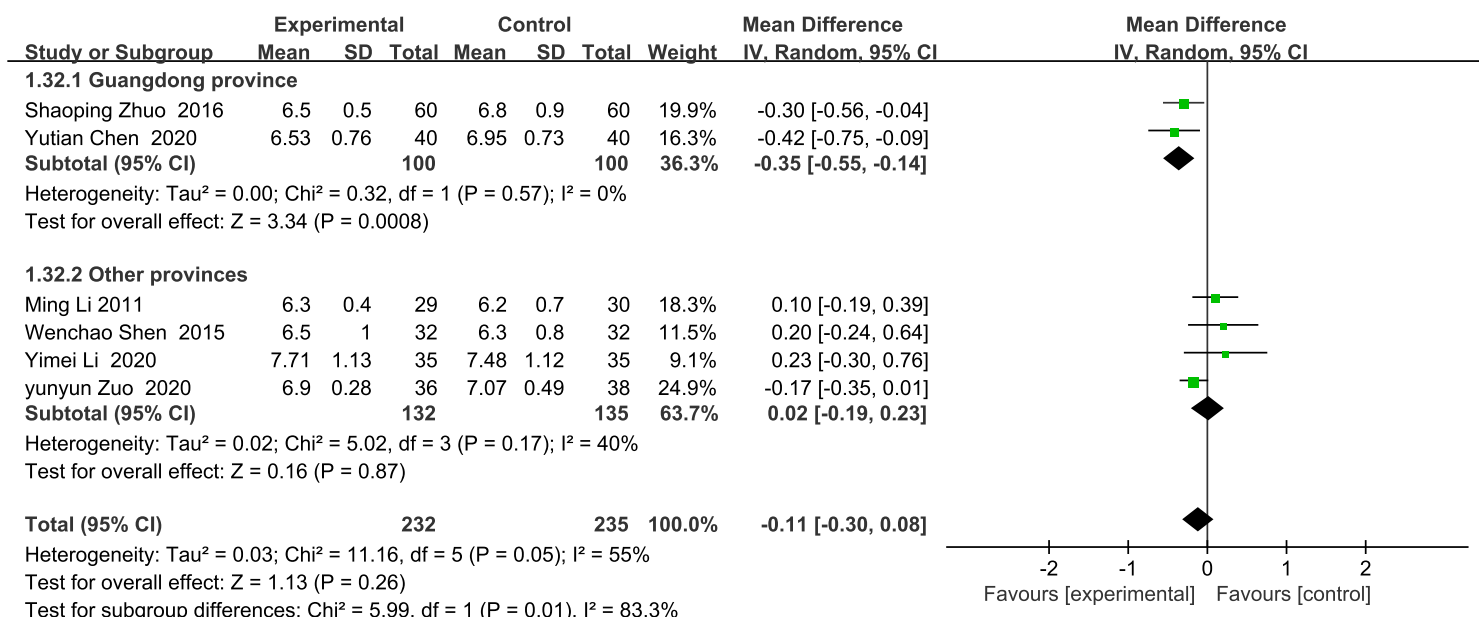

Supplement: f1 [file 1720749.f1.zip]

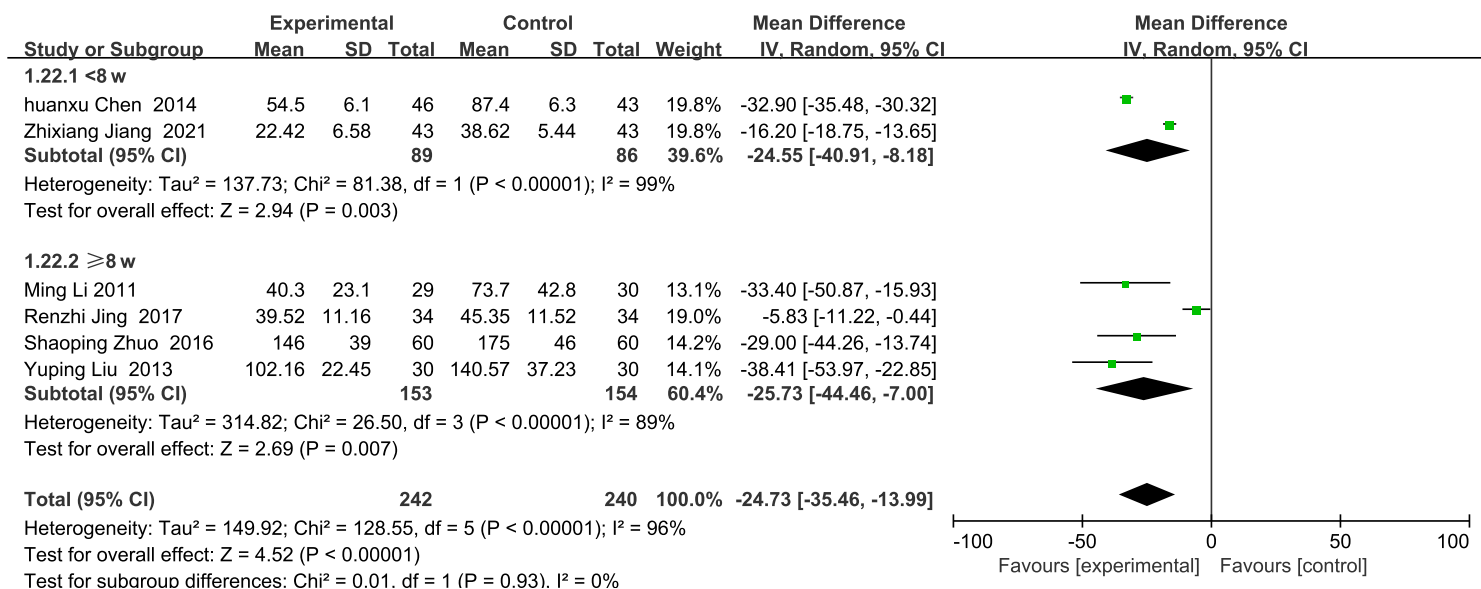

Supplement: f1 [file 1720749.f1.zip]

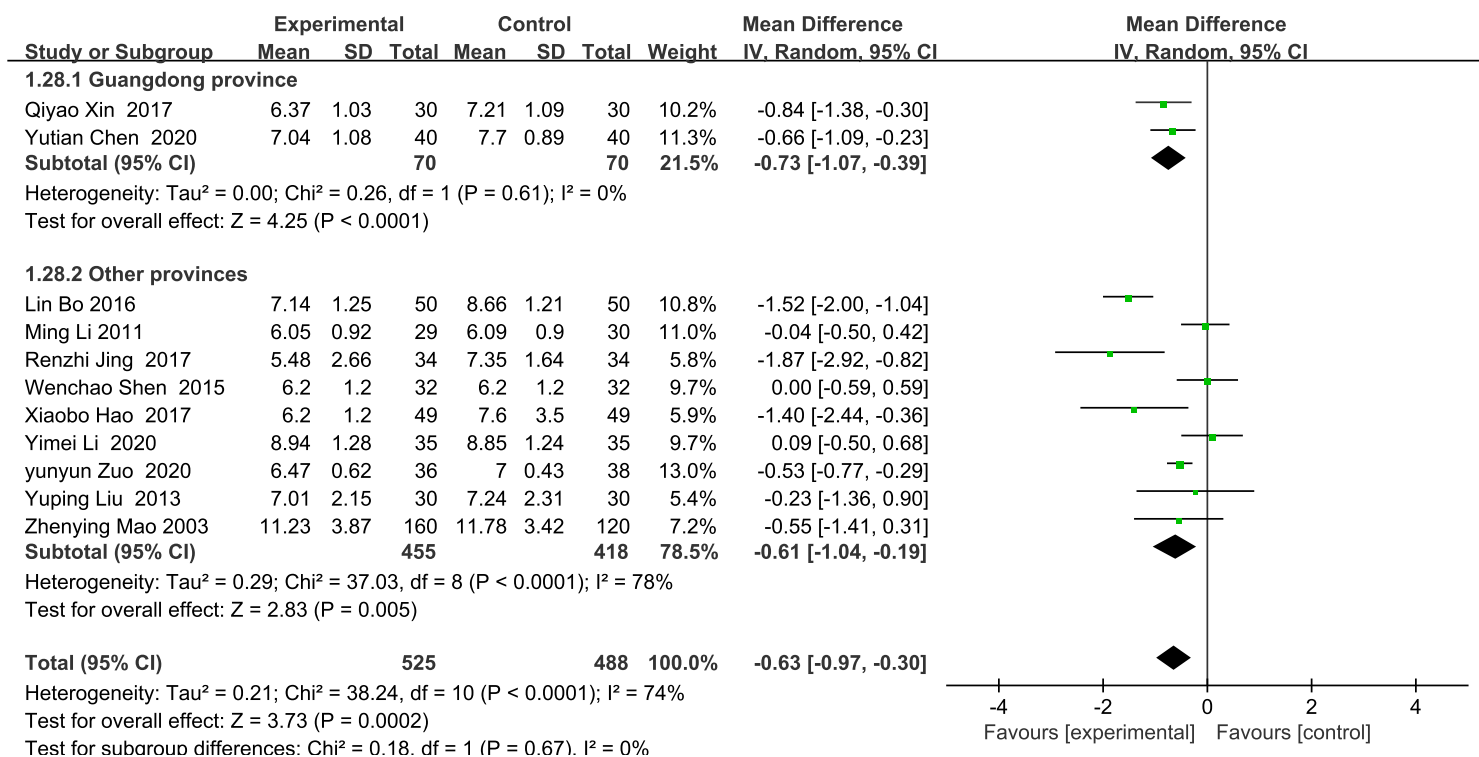

Supplement: f1 [file 1720749.f1.zip]

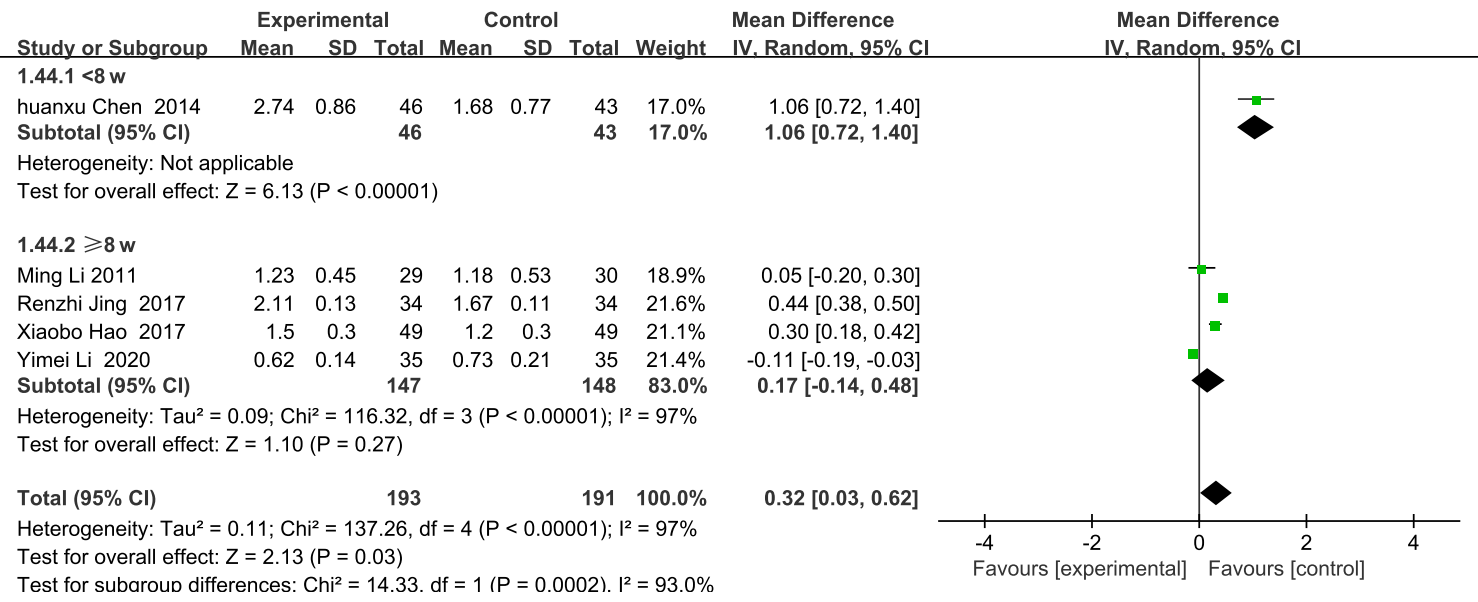

Supplement: f1 [file 1720749.f1.zip]

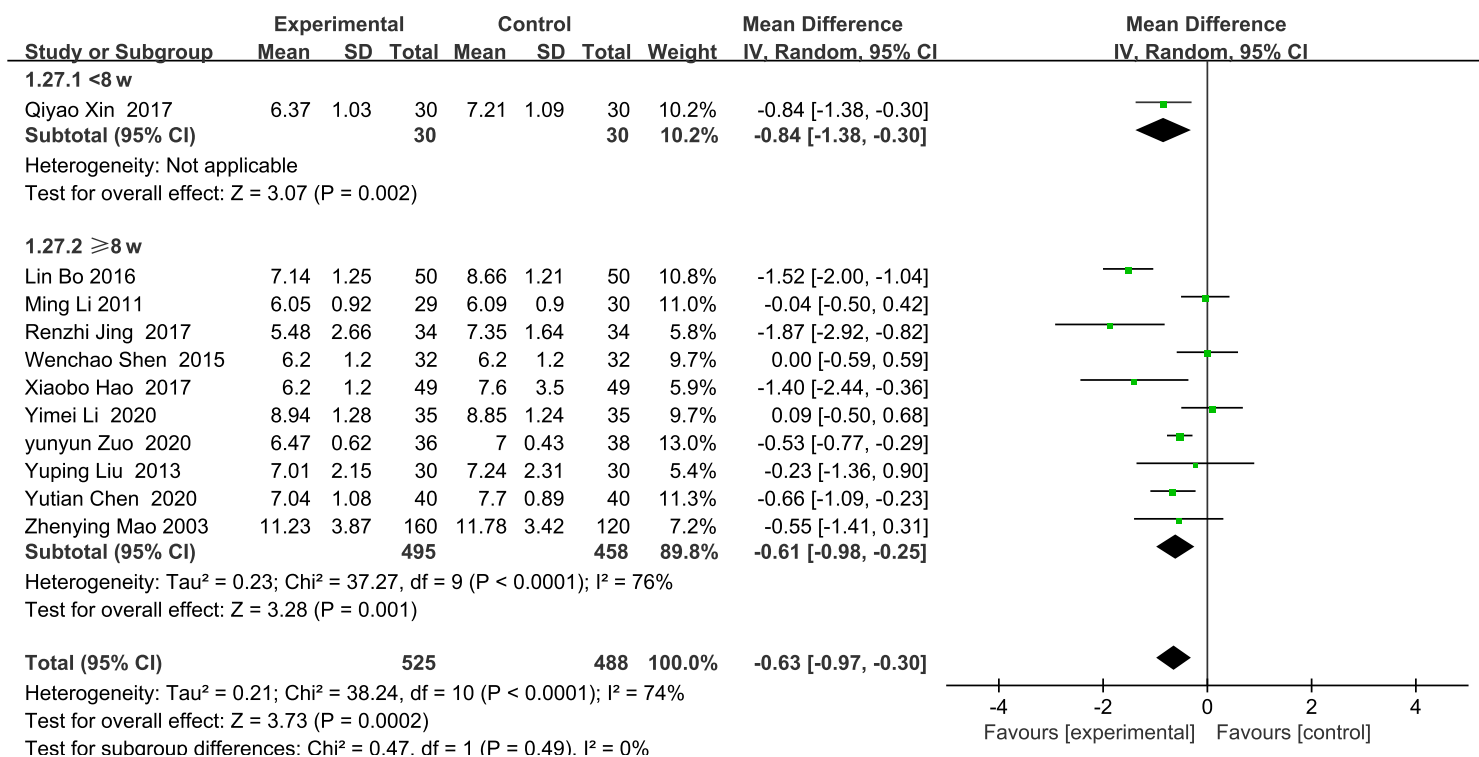

Supplement: f1 [file 1720749.f1.zip]

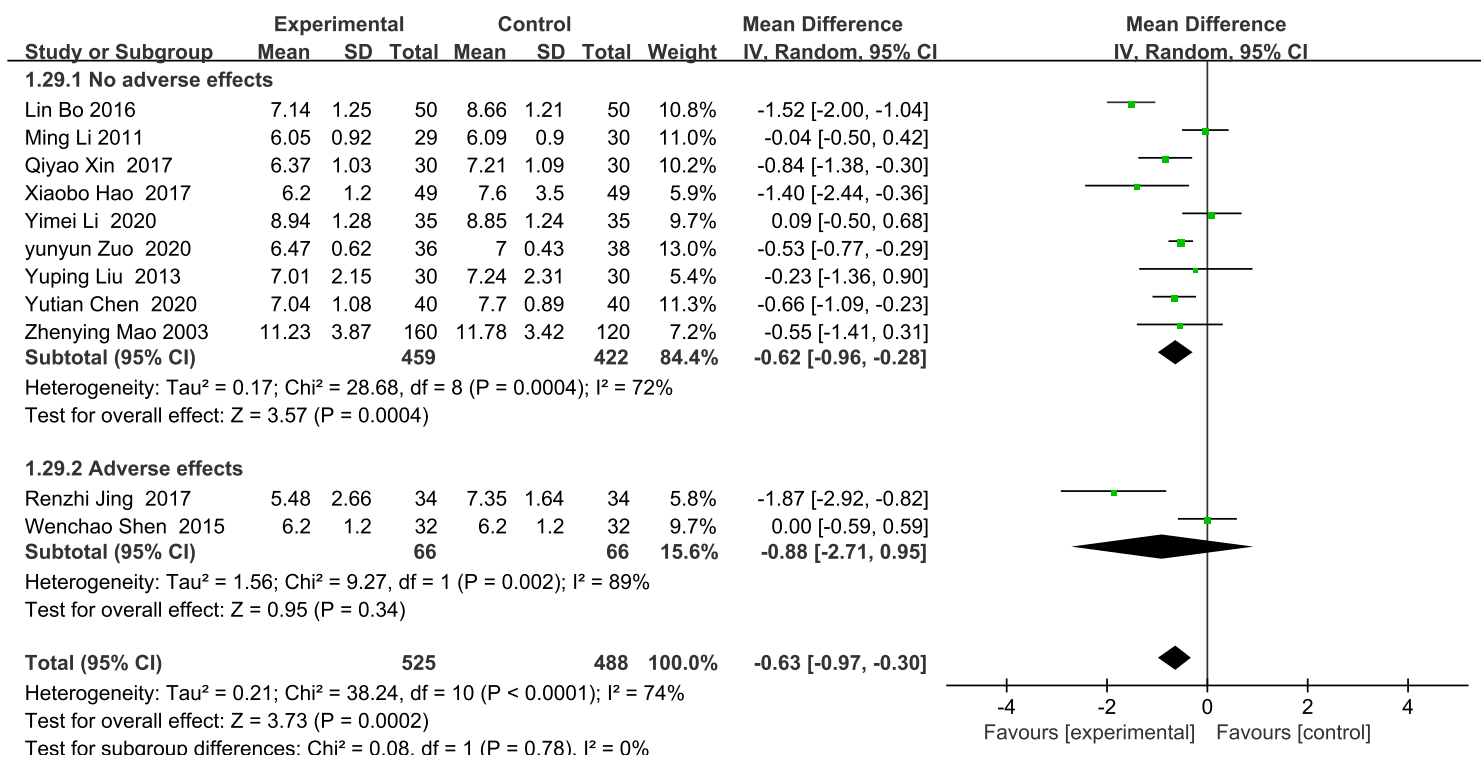

Supplement: f1 [file 1720749.f1.zip]

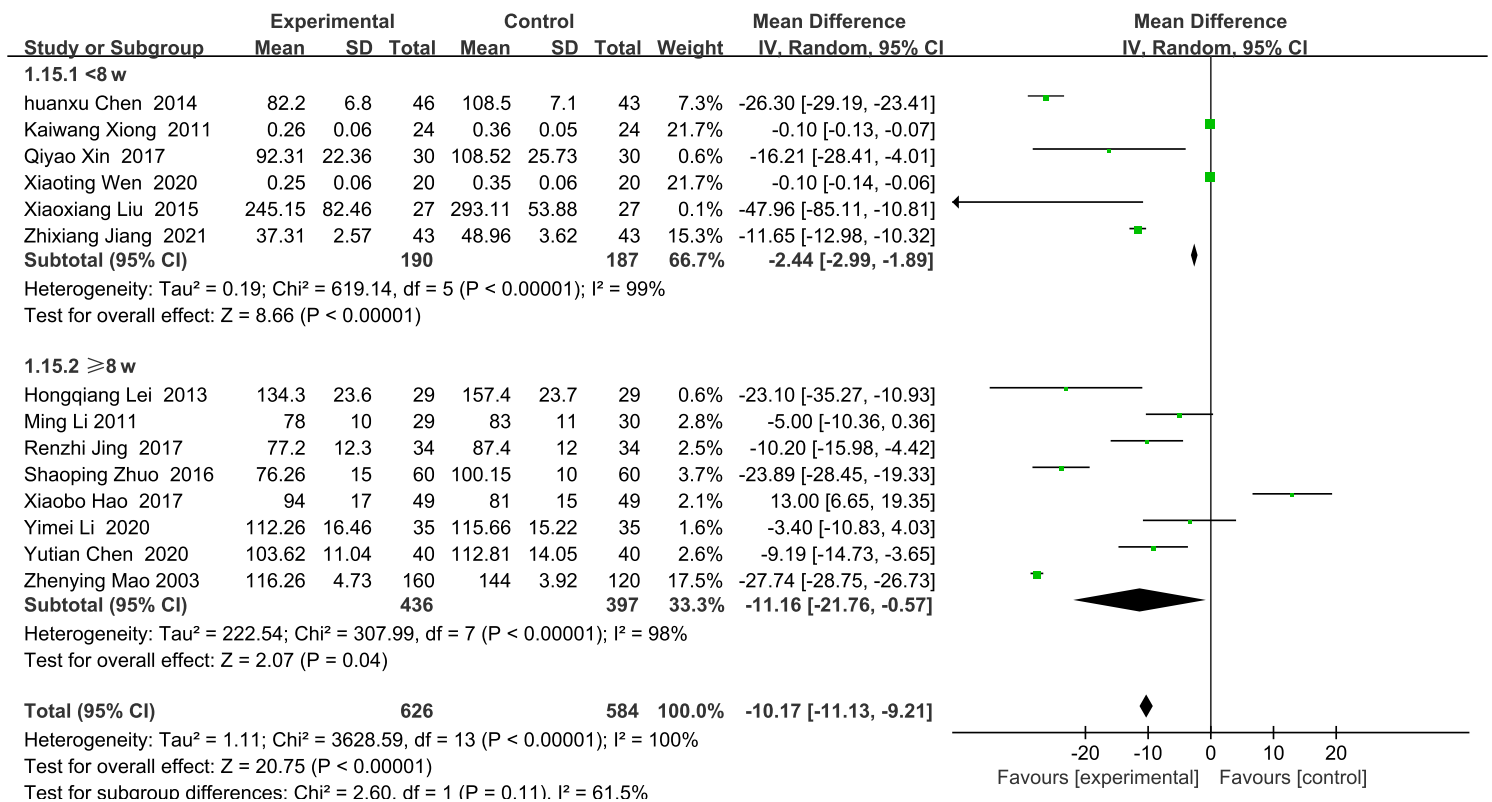

Supplement: f1 [file 1720749.f1.zip]

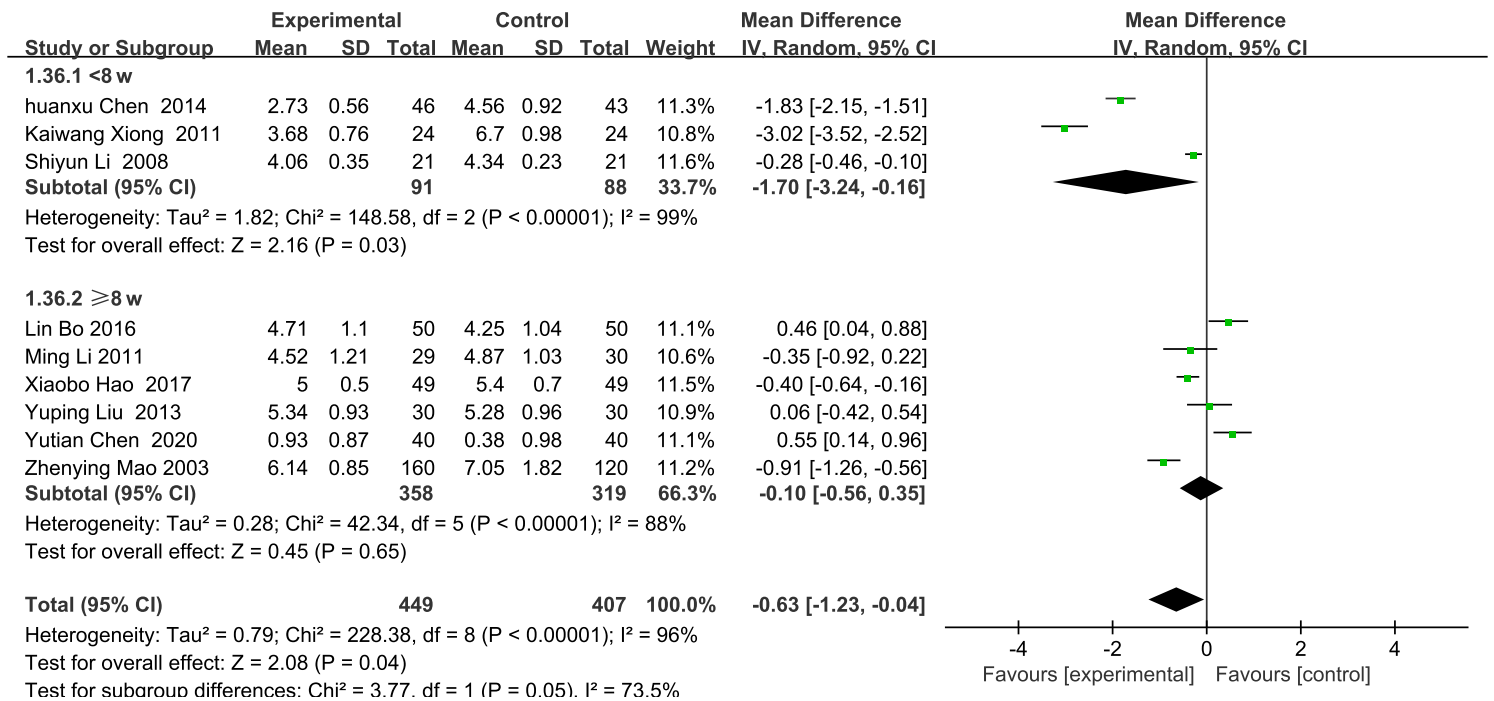

Supplement: f1 [file 1720749.f1.zip]

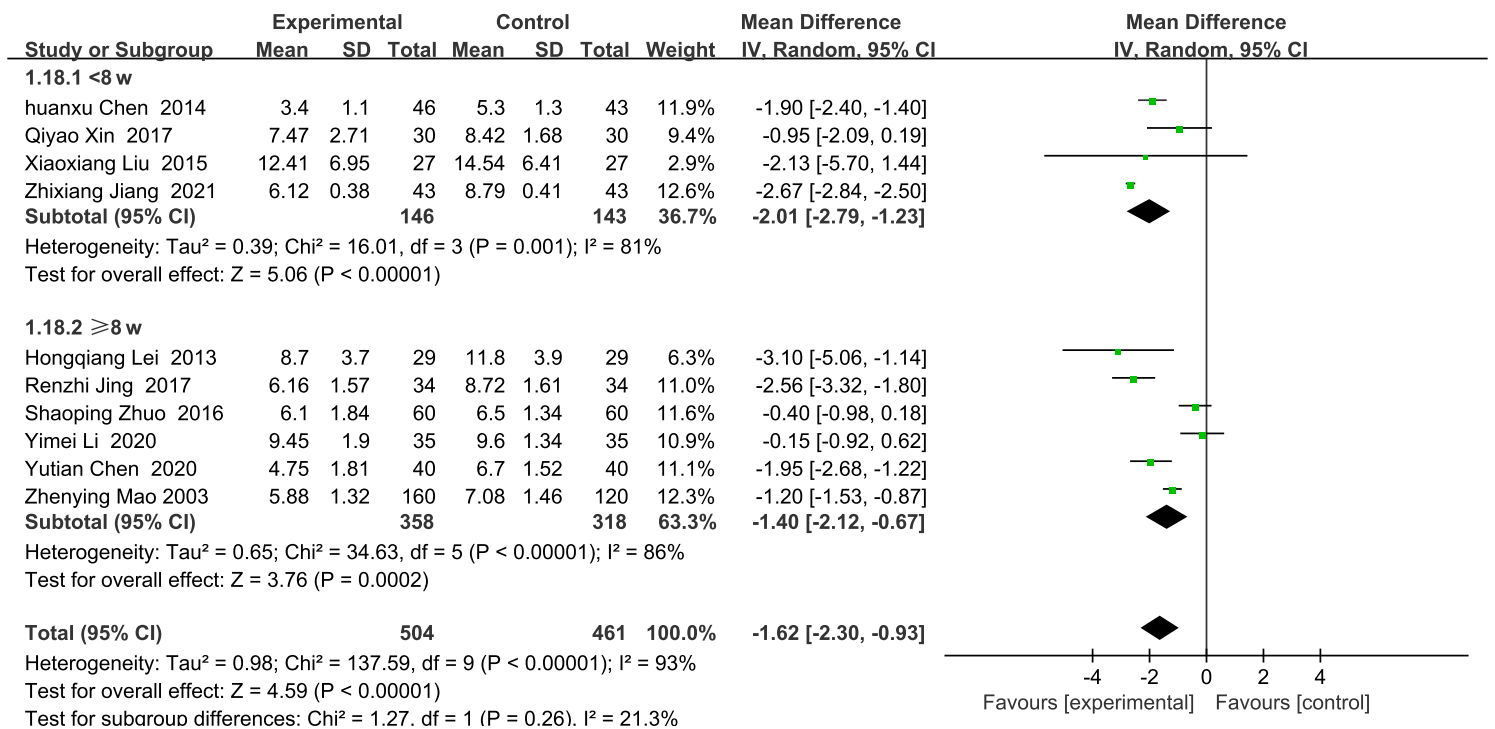

Supplement: f1 [file 1720749.f1.zip]

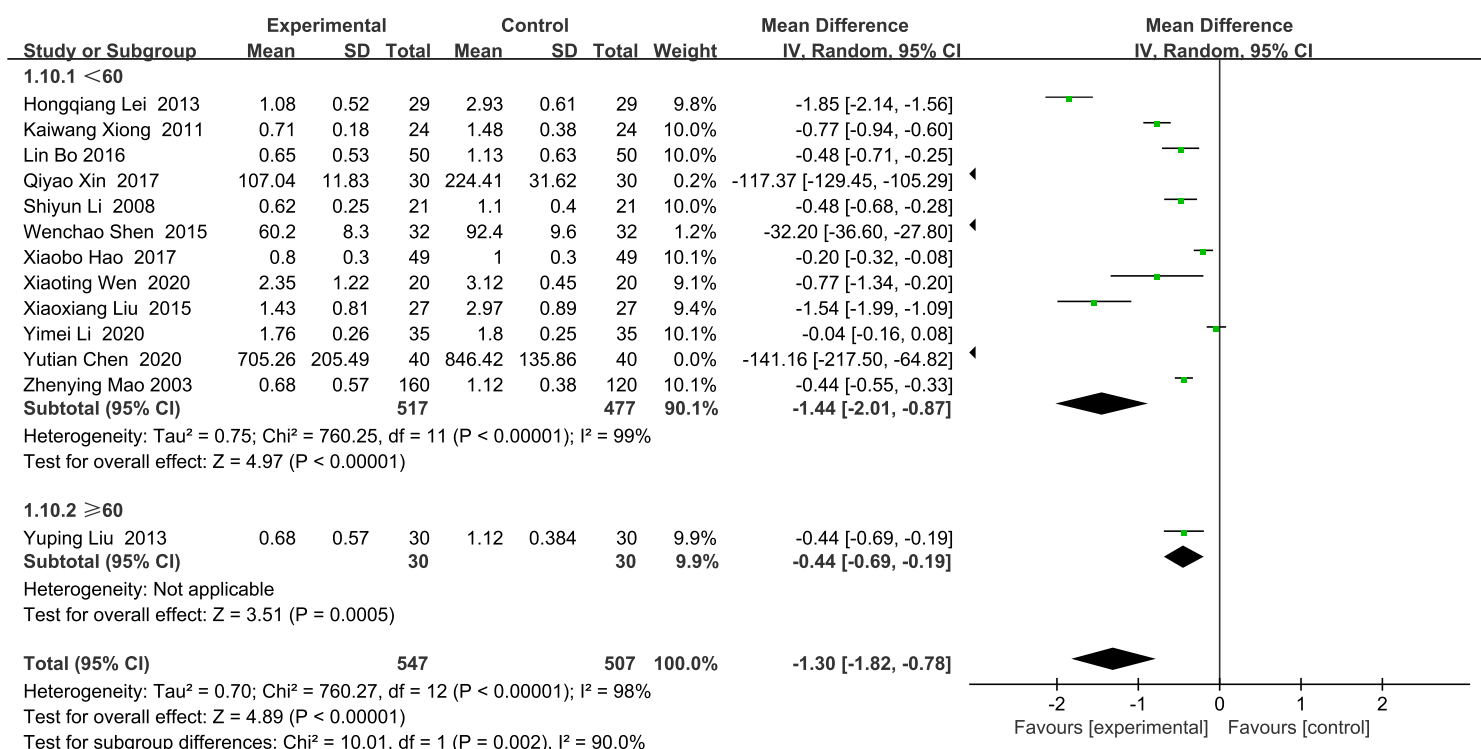

Supplement: f1 [file 1720749.f1.zip]

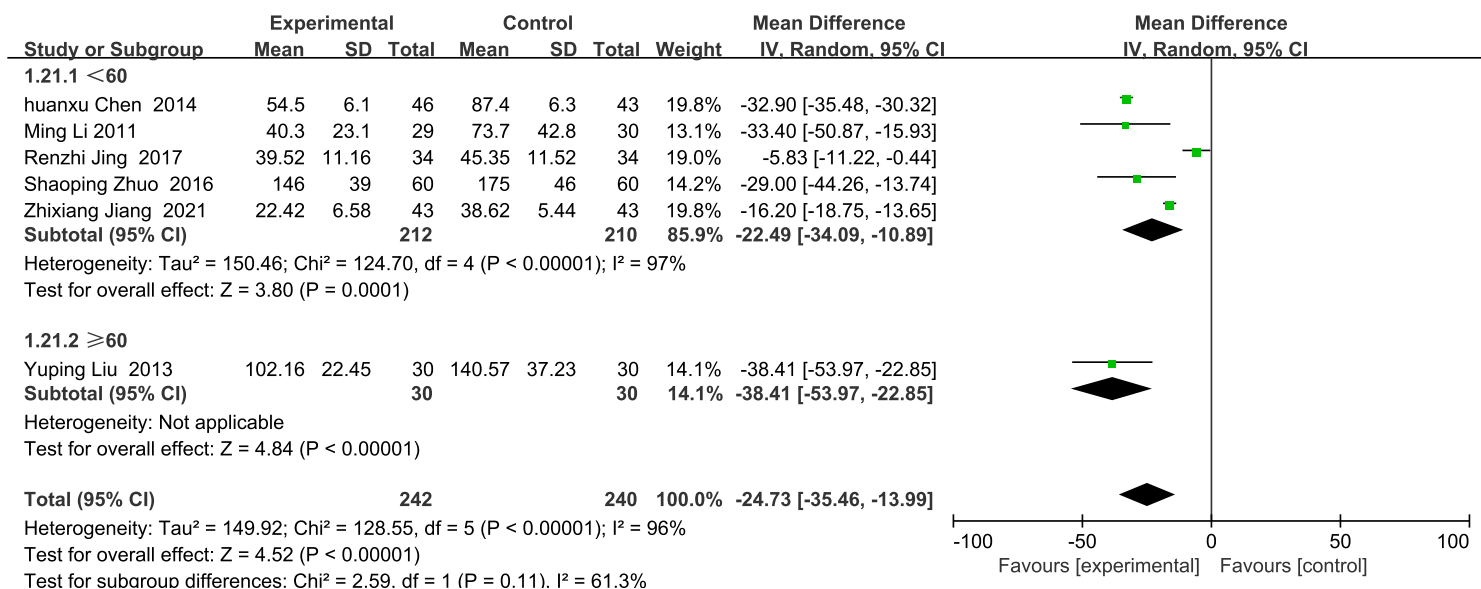

Supplement: f1 [file 1720749.f1.zip]

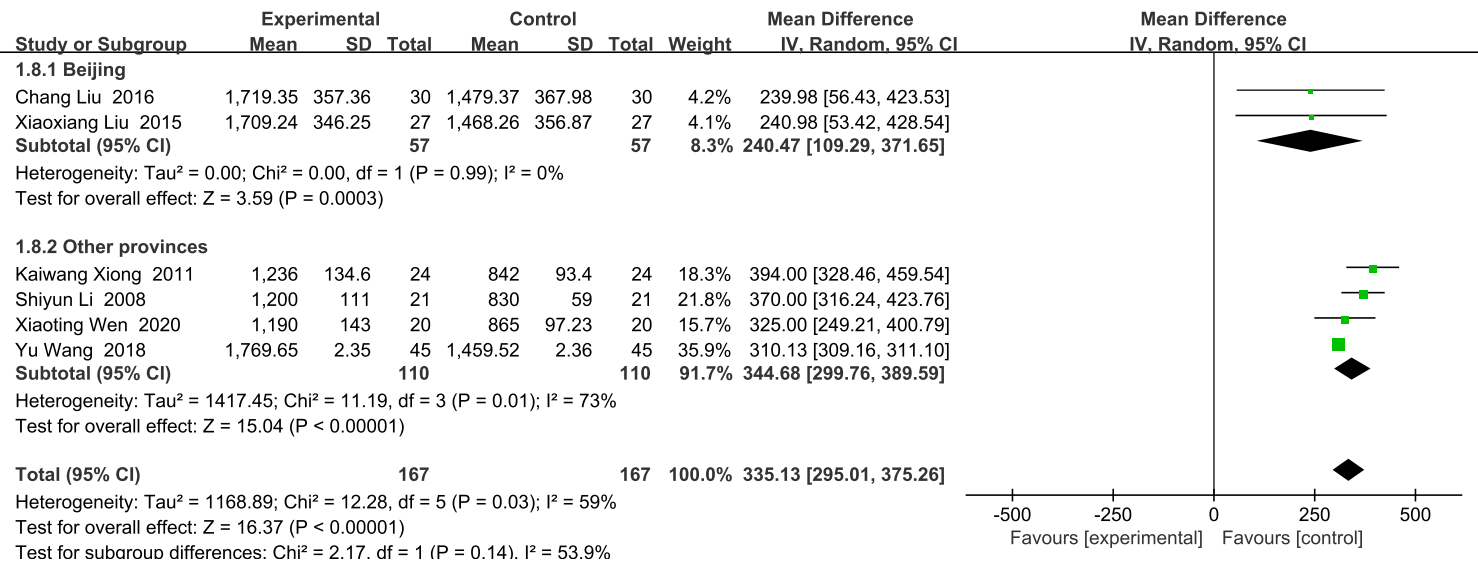

Supplement: f1 [file 1720749.f1.zip]
